# Supplementary material for: Effects of smoking, gender and occupational exposure on the risk of severe pulmonary fibrosis: a population-based case-control study
Source: PubMed Central journal article supplement — BMJ Open. 2014 Jan 9;4(1):e004018. doi: 10.1136/bmjopen-2013-004018 (PMC3902328; doi:10.1136/bmjopen-2013-004018), 2014-01-09
Supplement: bmjopen-2013-004018.draft_revisions.pdf [file bmjopen-2013-004018.draft_revisions.pdf]

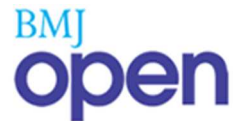

**Effects of smoking, gender and occupational exposures on the risk of severe pulmonary fibrosis: a population based case-control study**

|                                 |                                                                                                                                                                                                                                                                                                                                                                                                                                                                                                                                                                                                                                                                                                                                                                                                                                                                                          |
|---------------------------------|------------------------------------------------------------------------------------------------------------------------------------------------------------------------------------------------------------------------------------------------------------------------------------------------------------------------------------------------------------------------------------------------------------------------------------------------------------------------------------------------------------------------------------------------------------------------------------------------------------------------------------------------------------------------------------------------------------------------------------------------------------------------------------------------------------------------------------------------------------------------------------------|
| Journal:                        | <i>BMJ Open</i>                                                                                                                                                                                                                                                                                                                                                                                                                                                                                                                                                                                                                                                                                                                                                                                                                                                                          |
| Manuscript ID:                  | bmjopen-2013-004018                                                                                                                                                                                                                                                                                                                                                                                                                                                                                                                                                                                                                                                                                                                                                                                                                                                                      |
| Article Type:                   | Research                                                                                                                                                                                                                                                                                                                                                                                                                                                                                                                                                                                                                                                                                                                                                                                                                                                                                 |
| Date Submitted by the Author:   | 13-Sep-2013                                                                                                                                                                                                                                                                                                                                                                                                                                                                                                                                                                                                                                                                                                                                                                                                                                                                              |
| Complete List of Authors:       | Ekström, Magnus; Department of Clinical Sciences, Division of Respiratory Medicine & Allergology, Lund University, ; Department of Medicine, Blekinge Hospital, Gustafson, Torbjörn; Institution of Public Health and Clinical Medicine, Umeå University, Boman, Kurt; Institution of Public Health and Clinical Medicine, Umeå University, Nilsson, Kenneth; Respiratory Medicine Unit, Department of Medicine Solna, the Karolinska Institute and Karolinska University Hospital, Tornling, Göran; Respiratory Medicine Unit, Department of Medicine Solna, the Karolinska Institute and Karolinska University Hospital, Murgia, Nicola; Section for Occupational Medicine, Respiratory Diseases and Toxicology, University of Perugia, Toren, Kjell; Section for Occupational and Environmental Medicine, Institute of Medicine, Sahlgrenska Academy at the University of Gothenburg, |
| <b>Primary Subject Heading</b>: | Respiratory medicine                                                                                                                                                                                                                                                                                                                                                                                                                                                                                                                                                                                                                                                                                                                                                                                                                                                                     |
| Secondary Subject Heading:      | Epidemiology, Occupational and environmental medicine, Smoking and tobacco                                                                                                                                                                                                                                                                                                                                                                                                                                                                                                                                                                                                                                                                                                                                                                                                               |
| Keywords:                       | Epidemiology < TROPICAL MEDICINE, Thoracic medicine < INTERNAL MEDICINE, Interstitial lung disease < THORACIC MEDICINE                                                                                                                                                                                                                                                                                                                                                                                                                                                                                                                                                                                                                                                                                                                                                                   |
|                                 |                                                                                                                                                                                                                                                                                                                                                                                                                                                                                                                                                                                                                                                                                                                                                                                                                                                                                          |

SCHOLARONE™  
Manuscripts

1  
2  
3 **Effects of smoking, gender and occupational exposure on the risk of severe pulmonary**  
4 **fibrosis: a population based case-control study**  
5  
6  
7

8 Magnus Ekström, MD, PhD<sup>1,2</sup>; Torbjörn Gustafson, MD, PhD<sup>3</sup>; Kurt Boman, MD, PhD<sup>3</sup>;  
9  
10 Kenneth Nilsson, MD, PhD<sup>3</sup>; Göran Tornling, MD, PhD<sup>4</sup>; Nicola Murgia, MD<sup>5</sup>; Kjell Torén,  
11  
12 MD, FCCP, PhD<sup>6</sup>  
13  
14  
15  
16  
17

18  
19 <sup>1</sup> Department of Clinical Sciences, Division of Respiratory Medicine & Allergology, Lund  
20 University, SE-22100 Lund, Sweden  
21  
22

23  
24 <sup>2</sup> Department of Medicine, Blekinge Hospital, SE-371 85 Karlskrona, Sweden  
25  
26

27 <sup>3</sup> Institution of Public Health and Clinical Medicine, Umeå University, SE-901 85 Umeå,  
28 Sweden  
29  
30

31  
32 <sup>4</sup> Respiratory Medicine Unit, Department of Medicine Solna, the Karolinska Institute and  
33 Karolinska University Hospital, SE-171 76 Solna, Sweden  
34  
35

36  
37 <sup>5</sup> Section for Occupational Medicine, Respiratory Diseases and Toxicology, University of  
38 Perugia, 06123 Perugia, Italy  
39  
40

41  
42 <sup>6</sup> Section for Occupational and Environmental Medicine, Institute of Medicine, Sahlgrenska  
43 Academy at the University of Gothenburg, SE-405 30 Gothenburg, Sweden  
44  
45

46  
47 **Corresponding author:** Magnus Ekström, Department of Respiratory Medicine, Blekinge  
48 Hospital, SE-371 85 Karlskrona, Sweden. E-mail: [pmekstrom@gmail.com](mailto:pmekstrom@gmail.com). Tel: +46  
49 455731000.  
50  
51  
52

53  
54  
55 **Keywords:** Pulmonary fibrosis; Smoking; Occupational exposure; Mortality; Gender  
56  
57  
58  
59  
60

1  
2  
3 **Running title:** Interacting factors and severe pulmonary fibrosis  
4  
5

6 **Word count:** 1,865  
7  
8  
9  
10  
11  
12  
13  
14  
15  
16  
17  
18  
19  
20  
21  
22  
23  
24  
25  
26  
27  
28  
29  
30  
31  
32  
33  
34  
35  
36  
37  
38  
39  
40  
41  
42  
43  
44  
45  
46  
47  
48  
49  
50  
51  
52  
53  
54  
55  
56  
57  
58  
59  
60

For peer review only

1  
2  
3 Word count of abstract: 198  
4

5 **ABSTRACT**  
6  
7

8 **Objectives:** To estimate the effects of smoking, gender and occupational exposure on the risk  
9  
10 of developing severe pulmonary fibrosis (PF), including dose-response and interaction effects.  
11

12  
13 **Methods:** National case-control study of 171 patients (cases) starting long-term oxygen  
14  
15 therapy (LTOT) for PF in Sweden between February 1997 and April 2000, and 719 random  
16  
17 control subjects from the general population. Of cases, 137 had probable idiopathic  
18  
19 pulmonary fibrosis (IPF). The odds ratios (ORs) for smoking, gender, and occupational  
20  
21 exposure were estimated using Mantel-Haenzel analysis and conditional logistic regression,  
22  
23 controlling for age and year of diagnosis.  
24  
25

26  
27 **Results:** The adverse effect of smoking was amplified by male gender and occupational  
28  
29 exposure, OR 4.6 ([95% confidence interval] 2.1 – 10.3) for PF, and OR 3.0 (1.3 – 6.5) for  
30  
31 IPF, compared to in non-exposed women. Higher cumulative smoking exposure was linearly  
32  
33 associated with increased risks. Compared to smoking less than ten pack-years, smoking  $\geq 20$   
34  
35 pack-years was associated with increased risk of PF and IPF, OR 2.6 (1.4 – 4.9) and OR 2.5  
36  
37 (1.3 – 5.0), respectively.  
38  
39

40  
41 **Conclusion:** Smoking has a dose-related association with increased risk of severe PF. Men  
42  
43 with a history of smoking and occupational exposure is a particular risk group for developing  
44  
45 severe pulmonary fibrosis.  
46  
47  
48  
49  
50  
51  
52  
53  
54  
55  
56  
57  
58  
59  
60

## ARTICLE SUMMARY

### Article focus

- Smoking, male gender and occupational exposures are proposed risk factors for developing severe idiopathic pulmonary disease (IPF), but data on the interplay between these factors are limited.
- This study aims to estimate the effects of smoking, gender and occupational exposure on the risk of developing severe IPF, including interactions and dose-response effects.

### Key messages

- Smoking has a dose-response association with increased risk of severe IPF.
- The adverse effect of smoking is strongly amplified by male gender and occupational exposure. This study identifies men with a history of smoking and occupational exposures as a particular risk group for developing severe IPF.

### Strengths and limitations

- Population-based case-control study of subjects developing oxygen-dependent pulmonary in Sweden with randomly selected controls from the general population.
- Analysis of detailed exposure data, accounting for confounders and lag time between exposure and disease.
- As the underlying etiology may be difficult to ascertain in patients with oxygen-dependent pulmonary fibrosis, IPF was defined through review of national administrative register data and individual medical records.

## BACKGROUND

Pulmonary fibrosis (PF) constitutes a range of conditions that are either secondary to diseases or factors, such as systemic inflammatory disease and drug therapies, or primary, of which the most common is idiopathic pulmonary fibrosis (IPF).<sup>1</sup>

IPF is a chronic, progressive, fibrosing interstitial lung disease with a high risk of rapid progression and mortality.<sup>2</sup> Median survival after diagnosis is approximately two years.<sup>2</sup> The incidence of IPF has increased over time, with marked regional differences suggesting the pathogenic role of various environmental and occupational exposures.<sup>3</sup>

The etiology of IPF remains unknown.<sup>2</sup> The majority of IPF patients are men with a history of current or past smoking.<sup>2</sup> Most case-control studies have suggested an association between smoking and an increased risk of IPF,<sup>4-7</sup> although one study reported no such association.<sup>8</sup>

This inconsistency is most likely due to differences in study settings, the included covariates and, in some studies, the use of hospital patients as control subjects, which might have biased the smoking estimates.<sup>4 7 9-11</sup> Occupational exposures, including metal, stone and wood dust, have been linked to higher risks of developing IPF.<sup>12</sup>

It is unknown if there are interactions between smoking, gender and occupational exposure, and the risk of developing IPF. The only two studies which analyzed interactions reported a tendency towards an amplified IPF risk in patients with a history of smoking and occupational exposure, but the studies failed to establish statistically significant interactions.<sup>6,13</sup> Moreover, it is unclear if smoking really is an etiologic factor for IPF, as studies included low numbers of patients, and data on whether there is a dose-dependent relation between smoking and the risk of IPF are limited.

1  
2  
3 The aim of the present nationwide case-control study was therefore to estimate the  
4  
5 associations between smoking, gender, occupational exposure, and the risk of developing  
6  
7 severe pulmonary fibrosis.  
8  
9

## 16 **METHODS**

19 This was a national, register-based case-control study. Patients starting long-term oxygen  
20  
21 therapy (LTOT) for PF between 1 February 1997 and 4 April 2000 in the national Swedevox  
22  
23 register were eligible for inclusion as cases. The Swedevox register covers some 85% of all  
24  
25 patients starting LTOT in Sweden.<sup>13</sup> Details of the study design and a previous analysis using  
26  
27 the same data set have been published.<sup>14</sup> Data was collected through an extensive postal  
28  
29 questionnaire on smoking, occupational exposure (including fibers, fumes, gas, mineral dust,  
30  
31 organic dust, and vapours) and diagnosis of PF. The questionnaire has been described in detail  
32  
33 elsewhere.<sup>15</sup> Smoking data included the year of starting smoking, date of stopping smoking,  
34  
35 and the mean number of smoked cigarettes per day during each ten year period between ages  
36  
37 15 – 65 years, and the mean exposure after 65.<sup>15</sup> After the exclusion of patients who were  
38  
39 incorrectly registered (n = 12; 5%) or did not respond to the questionnaire (n=58; 24%), 171  
40  
41  
42  
43  
44 PF cases were included in the analysis.

45  
46 Patients with probable idiopathic pulmonary fibrosis (IPF cases, n = 137) were identified  
47  
48 through a review of each patient's medical record done independently by specialists in  
49  
50 respiratory medicine (KN, TG).<sup>14</sup> IPF cases in the study included only patients without any  
51  
52 identifiable or probable cause of PF (infection, pneumoconiosis, medications, irradiation,  
53  
54 rheumatic or systemic inflammatory diseases etc.)<sup>14</sup>  
55  
56  
57  
58  
59  
60

1  
2  
3 Control subjects were selected as a random sample (n = 1000) from the general population of  
4  
5 the same age range as the PF patients. Of the control subjects, 719 (72%) returned complete  
6  
7 exposure data and were included in the analysis.  
8  
9

### 10 11 12 13 **Ethics Statement**

14  
15  
16 All participants gave their informed consent to participate. The study was approved by all the  
17  
18 relevant ethics committees in Sweden, the Swedish National Board of Health and Welfare,  
19  
20 and the Data Inspection Board.  
21  
22

### 23 24 25 26 27 **Statistical Analysis**

28  
29  
30 Cases and control subjects were categorized according to year of birth (1906 – 1923, 1924 –  
31  
32 1936 or 1937 – 1969) and cases according to year they received their PF diagnosis (1968–  
33  
34 1986, 1987–1993 or 1994–1999). Control subjects were assigned a time point corresponding  
35  
36 to the year patients received their PF diagnosis, using a method described previously.<sup>14 15</sup>  
37

38  
39 First, control subjects within each birth year group were assigned a random diagnosis year  
40  
41 group, weighted by the number of cases in each diagnosis year group. Then, the year of PF  
42  
43 diagnosis of each control subject was set to the mid-year of the corresponding year of the  
44  
45 patient group. Characteristics at baseline (the date the questionnaire was filled in) were  
46  
47 presented using frequencies and percentages for categorical variables. Continuous data were  
48  
49 presented using mean with standard deviation (SD) and median with range or interquartile  
50  
51 range (IQR) for variables with normal and skewed distribution, respectively.  
52  
53

54  
55 Smoking status and cumulative smoking exposure, calculated as pack years ([mean number of  
56  
57 cigarettes per day] / 20 x [years of exposure]), were recorded up to 10 years prior to the date  
58  
59  
60



1  
2  
3 of the PF diagnosis (a 10-year time lag), allowing time between smoke exposure and the  
4  
5 development of oxygen-dependent PF.  
6  
7

8 Associations between smoking and the risk of developing oxygen-dependent PF and IPF, and  
9  
10 the interactions between smoking, occupational exposure and gender were estimated and  
11  
12 reported using Mantel-Haenzel analysis, controlling for year of birth, year of diagnosis and  
13  
14 gender, as applicable. Interactions were also analyzed using conditional logistic regression,  
15  
16 stratified for year of birth, year of diagnosis, gender, with adjustment for age and pack-years  
17  
18 of smoking. All estimates were consistent between Mantel-Haenzel analysis and the  
19  
20 conditional logistic models.  
21  
22

23  
24 Associations were expressed as odds ratios (ORs) with 95% confidence intervals (CIs).  
25  
26 Statistical significance was defined as a double-sided  $p < 0.05$ . Statistical analyses were  
27  
28 performed using Stata version 11.1 (StataCorp LP; College Station, TX) and SAS version 9.2  
29  
30 (SAS Institute, Inc., Cary, NC).  
31  
32  
33  
34  
35  
36  
37  
38  
39

## 40 **RESULTS**

41  
42  
43 We included 171 patients with PF, of whom 137 were classified as having IPF, and 719  
44  
45 control subjects. Baseline characteristics are shown in Table 1. Among PF cases, the rate of  
46  
47 occupational exposure was higher in men than in women (80% vs. 52 %;  $p < 0.001$ ). Men  
48  
49 also had higher smoking exposure. Ten years before the PF diagnosis, 90 (84%) men were  
50  
51 ever-smokers with a median 10 (IQR, 3 – 23) pack years, compared to 29 (45%) women with  
52  
53 a median 8 (IQR, 3 – 15) pack years. A similar difference was seen for IPF cases.  
54  
55  
56  
57  
58  
59  
60

1  
2  
3 There was a significant interaction between smoking, occupational exposure and gender, and  
4 the risk of oxygen-dependent PF (test of homogeneity,  $p = 0.028$ ). The differences in effects  
5 were similar for IPF (Table 2). Men with current or past smoking and occupational exposure  
6 had markedly increased risk of PF, OR 4.6 (2.1 – 10.3), and IPF, OR 3.0 (1.3 – 6.5),  
7 compared to non-exposed women (Table 2). Adjustment for differences in pack years  
8 between men and women, in addition to the other covariates, did not affect the estimates.

9  
10  
11  
12  
13  
14  
15  
16  
17 There was a linear association between higher cumulative smoking exposure (up to ten years  
18 before diagnosis) and increased risk of PF and IPF, OR 1.03 (95% CI, 1.01 – 1.04) per pack  
19 year and OR 1.02 (95% CI, 1.01 – 1.04) per pack year, respectively. Compared to lower  
20 levels of smoking (1 – 9 pack years), heavy smoking ( $\geq 20$  pack years) was associated with an  
21 increased risk of PF, OR 2.6 (95% CI, 1.4 – 4.9), and IPF, OR 2.5 (95% CI, 1.3 – 5.0), as  
22 shown in Table 3. Using a 5-year time lag for smoking exposure instead of 10 years resulted  
23 in similar estimates.  
24  
25  
26  
27  
28  
29  
30  
31  
32  
33  
34  
35  
36  
37  
38

## 39 DISCUSSION

40  
41  
42 The main findings are that 1) smoking was a risk determinant in the development of oxygen-  
43 dependent pulmonary fibrosis and that this risk was amplified by male gender and  
44 occupational exposure; 2) the association with smoking was dose-dependent, which may  
45 support the theory of the causative role of smoking in the pathogenesis of severe pulmonary  
46 fibrosis.  
47  
48  
49  
50  
51  
52

53  
54 Our findings are consistent with reports of increased risk of IPF associated with smoking<sup>4-6 10</sup>  
55 and occupational exposures.<sup>4-7 9 12 14 16</sup> A previous analysis using the present data set  
56  
57  
58  
59  
60

1  
2  
3 showed that specific occupational factors associated with an increased risk of PF included  
4 exposure to birds and wood dust.<sup>14</sup> Studies of a possible dose-response correlation between  
5 smoking and IPF have shown conflicting results, with two studies indicating a dose-dependent  
6 effect<sup>5 6</sup> and one study showing no dose correlation.<sup>17</sup> The latter study, however, analyzed  
7 only smoking status and the current smoking dose (cigarettes per day) and not cumulative  
8 smoking exposure such as pack years.<sup>17</sup> The present study extends the previous observations  
9 by demonstrating that the association between smoking and severe pulmonary fibrosis is  
10 dose-dependent and is modified by gender and occupational exposure.  
11  
12  
13  
14  
15  
16  
17  
18  
19

20  
21 A strength of the present study is that it included cases from a population-based prospective  
22 register of patients starting LTOT in Sweden. Control subjects were randomly selected from  
23 the general population. Previous studies using control subjects in hospitals may have yielded  
24 biased estimates, as the risk of hospitalization is likely to be related to occupational factors  
25 and smoking.<sup>4 7 9-11</sup> We had detailed data on the temporality, dose and duration of smoking. In  
26 contrast with previous studies, only exposure data up to ten years before the year of the PF  
27 diagnosis was included in the analysis to avoid reverse causation and to allow for the time lag  
28 between exposure to risk factors and the manifestation of clinical disease.  
29  
30  
31  
32  
33  
34  
35  
36  
37  
38

39 A possible limitation is that the self-reported exposure data could be influenced by recall bias.  
40 The validity of the exposure classification is, however, supported by a high degree of  
41 consistency between reported employment histories and occupational exposure to specific  
42 agents.<sup>14</sup> Secondly, the association between smoking and starting LTOT could be affected by  
43 survivor bias, as smokers are likely to be at high risk of dying of other diseases, such as  
44 cancer and cardiovascular disease, before they can develop severe IPF. Also, stopping  
45 smoking is a mandatory criterion for starting LTOT. Both these potential biases would tend to  
46 lower the number of smokers starting LTOT and our findings might thus underestimate the  
47 association between smoking and oxygen-dependent PF. Thirdly, the IPF diagnosis could be  
48  
49  
50  
51  
52  
53  
54  
55  
56  
57  
58  
59  
60

1  
2  
3 misclassified in some patients. The validity of the PF and IPF diagnoses was checked by a  
4  
5 respiratory physician using medical records, including available radiographic and histologic  
6  
7 data.<sup>14</sup> Among idiopathic interstitial pneumonias, IPF is the most common condition and it is  
8  
9 associated with a high risk of progression to hypoxemic respiratory failure and death.<sup>1 18</sup> Thus,  
10  
11 the prevalence of IPF is likely high in oxygen-dependent pulmonary fibrosis. We included the  
12  
13 PF cohort in the analysis, as it may be difficult to obtain a specific diagnosis in patients with  
14  
15 advanced pulmonary fibrosis at the clinic. Our results were consistent in both the PF and IPF  
16  
17 groups, which supports the validity of the present findings.  
18  
19

20  
21 Mechanisms governing the relationship between smoking, gender, occupational exposure,  
22  
23 and the development of severe pulmonary fibrosis are unknown but likely involve complex  
24  
25 interactions between different environmental factors in genetically predisposed individuals.<sup>19</sup>  
26  
27 The adverse effect of smoking could in part be attributable to the development of concurrent  
28  
29 emphysema, which has been shown to predict hypoxemia and a poor prognosis in IPF.<sup>20</sup>  
30  
31

32  
33 For the clinician, this study identifies a group of male, heavy smokers with occupational  
34  
35 exposure to harmful substances, who have a greatly increased risk of developing severe  
36  
37 pulmonary fibrosis. In this group, interventions to help people reduce or stop smoking are a  
38  
39 top priority.  
40  
41

42  
43 In conclusion, smoking is associated with a dose-dependent increase in oxygen-dependent  
44  
45 pulmonary fibrosis. The adverse effects of smoking are stronger in men and in people with  
46  
47 occupational exposure.  
48  
49

## 50 51 52 53 **ACKNOWLEDGEMENTS** 54 55 56 57 58 59 60

1  
2  
3 **Author contributions:** ME had full access to all the data in the study and takes full  
4  
5 responsibility for the integrity of the data and the accuracy of the data analysis. Conception  
6  
7 and design: KB, KN, GT, KT; Acquisition of data: TG, KB, KN, GT, KT; Analysis and  
8  
9 interpretation of data: ME, TG, NM, KT; Drafting the article: ME, TG, KT; Revising it for  
10  
11 important intellectual content and approval of the version to be published: ME, TG, KB, KN,  
12  
13 GT, NM, KT.  
14  
15

16  
17 **Funding:** This study was funded by the Research Council of Blekinge, the Swedish National  
18  
19 Board of Health and Welfare, and the Swedish Heart-Lung Foundation.  
20  
21

22 **Conflicts of interest:** No conflicts of interest exist for the authors.  
23  
24

25 **Other contributions:** The authors thank Kerstin Ström for her invaluable help and inspiration  
26  
27 throughout the study process, and the doctors and nurses who cared for the patients.  
28  
29

30 **Data sharing statement:** Analysis code is available from the corresponding author. No  
31  
32 additional data is available.  
33  
34  
35  
36  
37  
38  
39  
40  
41  
42  
43  
44  
45  
46  
47  
48  
49  
50  
51  
52  
53  
54  
55  
56  
57  
58  
59  
60

## References

- 1 American Thoracic Society/European Respiratory Society International Multidisciplinary  
2  
3  
4  
5  
6 Consensus Classification of the Idiopathic Interstitial Pneumonias. This joint statement of the  
7  
8 American Thoracic Society (ATS), and the European Respiratory Society (ERS) was adopted by  
9  
10 the ATS board of directors, June 2001 and by the ERS Executive Committee, June 2001. *Am J*  
11  
12 *Respir Crit Care Med* 2002;165:277-304.
- 13  
14  
15  
16  
17 2 Raghu G, Collard HR, Egan JJ et al. An official ATS/ERS/JRS/ALAT statement: idiopathic  
18  
19 pulmonary fibrosis: evidence-based guidelines for diagnosis and management. *American*  
20  
21 *Journal of Respiratory and Critical Care Medicine* 2011;183:788-824.
- 22  
23  
24 3 Navaratnam V, Fleming KM, West J et al. The rising incidence of idiopathic pulmonary fibrosis  
25  
26 in the U.K. *Thorax* 2011;66:462-7.
- 27  
28 4 Iwai K, Mori T, Yamada N, Yamaguchi M, Hosoda Y. Idiopathic pulmonary fibrosis.  
29  
30 Epidemiologic approaches to occupational exposure. *American Journal of Respiratory and*  
31  
32 *Critical Care Medicine* 1994;150:670-5.
- 33  
34 5 Hubbard R, Lewis S, Richards K, Johnston I, Britton J. Occupational exposure to metal or  
35  
36 wood dust and aetiology of cryptogenic fibrosing alveolitis. *Lancet* 1996;347:284-9.
- 37  
38 6 Baumgartner KB, Samet JM, Stidley CA, Colby TV, Waldron JA. Cigarette smoking: a risk factor  
39  
40 for idiopathic pulmonary fibrosis. *American Journal of Respiratory and Critical Care Medicine*  
41  
42 1997;155:242-8.
- 43  
44 7 Miyake Y, Sasaki S, Yokoyama T et al. Occupational and environmental factors and idiopathic  
45  
46 pulmonary fibrosis in Japan. *The Annals of occupational hygiene* 2005;49:259-65.
- 47  
48 8 Scott J, Johnston I, Britton J. What causes cryptogenic fibrosing alveolitis? A case-control  
49  
50 study of environmental exposure to dust. *BMJ* 1990;301:1015-7.
- 51  
52 9 Awadalla NJ, Hegazy A, Elmetwally RA, Wahby I. Occupational and environmental risk factors  
53  
54 for idiopathic pulmonary fibrosis in Egypt: a multicenter case-control study. *Int J Occup*  
55  
56 *Environ Med* 2012;3:107-16.
- 57  
58  
59  
60

- 1  
2  
3 10 Garcia-Sancho Figueroa MC, Carrillo G, Perez-Padilla R et al. Risk factors for idiopathic  
4 pulmonary fibrosis in a Mexican population. A case-control study. *Respir Med* 2010;104:305-  
5  
6 9.  
7  
8  
9 11 Miyake Y, Sasaki S, Yokoyama T et al. Case-control study of medical history and idiopathic  
10 pulmonary fibrosis in Japan. *Respirology* 2005;10:504-9.  
11  
12  
13 12 Taskar VS, Coultas DB. Is idiopathic pulmonary fibrosis an environmental disease?  
14  
15 *Proceedings of the American Thoracic Society* 2006;3:293-8.  
16  
17  
18 13 Strom K, Boe J. A national register for long-term oxygen therapy in chronic hypoxia:  
19 preliminary results. *Eur Respir J* 1988;1:952-8.  
20  
21  
22 14 Gustafson T, Dahlman-Hoglund A, Nilsson K, Strom K, Tornling G, Toren K. Occupational  
23 exposure and severe pulmonary fibrosis. *Respir Med* 2007;101:2207-12.  
24  
25  
26 15 Toren K, Jarvholm B, Brisman J, Hagberg S, Hermansson BA, Lillienberg L. Adult-onset asthma  
27 and occupational exposures. *Scand J Work Environ Health* 1999;25:430-5.  
28  
29  
30 16 Baumgartner KB, Samet JM, Coultas DB et al. Occupational and environmental risk factors for  
31 idiopathic pulmonary fibrosis: a multicenter case-control study. Collaborating Centers. *Am J*  
32  
33 *Epidemiol* 2000;152:307-15.  
34  
35  
36 17 Gribbin J, Hubbard R, Smith C. Role of diabetes mellitus and gastro-oesophageal reflux in the  
37 aetiology of idiopathic pulmonary fibrosis. *Respir Med* 2009;103:927-31.  
38  
39  
40 18 Bjoraker JA, Ryu JH, Edwin MK et al. Prognostic significance of histopathologic subsets in  
41 idiopathic pulmonary fibrosis. *Am J Respir Crit Care Med* 1998;157:199-203.  
42  
43  
44 19 Macneal K, Schwartz DA. The genetic and environmental causes of pulmonary fibrosis. *Proc*  
45  
46 *Am Thorac Soc* 2012;9:120-5.  
47  
48  
49 20 Mejia M, Carrillo G, Rojas-Serrano J et al. Idiopathic pulmonary fibrosis and emphysema:  
50 decreased survival associated with severe pulmonary arterial hypertension. *Chest*  
51  
52 2009;136:10-5.  
53  
54  
55  
56  
57  
58  
59  
60

1  
2  
3  
4  
5  
6  
7  
8  
9  
10  
11  
12  
13  
14  
15  
16  
17  
18  
19  
20  
21  
22  
23  
24  
25  
26  
27  
28  
29  
30  
31  
32  
33  
34  
35  
36  
37  
38  
39  
40  
41  
42  
43  
44  
45  
46  
47  
48  
49  
50  
51  
52  
53  
54  
55  
56  
57  
58  
59  
60

For peer review only



## TABLES

Table 1. Patient characteristics

| Characteristic                                            | PF cases<br>(n = 171) | IPF<br>cases<br>(n = 137) | Controls<br>(n = 719) |
|-----------------------------------------------------------|-----------------------|---------------------------|-----------------------|
| Age                                                       | 73.7 ±<br>9.5         | 74.2 ±<br>9.8             | 64.3 ±<br>13.7        |
| Males, n (%)                                              | 107 (63)              | 86 (63)                   | 337 (47)              |
| Never-smokers, n (%)                                      | 52 (30)               | 44 (32)                   | 344 (48)              |
| Ex-smokers, n (%)                                         | 114 (67)              | 89 (65)                   | 251 (35)              |
| Current smokers, n (%)                                    | 5 (3)                 | 4 (3)                     | 124 (17)              |
| Smoking history up to 10 years before PF diagnosis, n (%) | 119 (70)              | 93 (68)                   | 375 (52)              |
| 1 – 9 pack years                                          | 29 (17)               | 22 (16)                   | 176 (24)              |
| 10 – 19 pack years                                        | 34 (20)               | 27 (20)                   | 91 (13)               |
| ≥ 20 pack years                                           | 36 (21)               | 27 (20)                   | 62 (9)                |
| Occupational exposure, n (%)                              | 119 (70)              | 93 (68)                   | 397 (55)              |

Data presented as mean ± standard deviation unless otherwise specified.

*Abbreviations:* IPF, idiopathic pulmonary fibrosis; PF, pulmonary fibrosis.

**Table 2. Effect of smoking on the adjusted risk of pulmonary fibrosis, according to gender and occupational exposure**

|                          | PF                  |                     | IPF                 |                    |
|--------------------------|---------------------|---------------------|---------------------|--------------------|
|                          | Odds ratio (95% CI) |                     | Odds ratio (95% CI) |                    |
|                          | Women               | Men                 | Women               | Men                |
| No occupational exposure | 1.10 (0.50 – 2.42)  | 1.97 (0.64 – 6.13)  | 1.12 (0.49 – 2.59)  | 1.44 (0.43 – 4.83) |
| Occupational exposure    | 1.10 (0.52 – 2.34)  | 4.63 (2.08 – 10.33) | 1.32 (0.58 – 3.03)  | 2.96 (1.34 – 6.52) |

Odds ratios (95% confidence interval) for the effect of smoking vs. no smoking on the risk of developing PF and IPF, estimated using Mantel Haenzel analysis controlled for year of birth and year of diagnosis. Smoking was defined as the presence of ever-smoking earlier than 10 years before the diagnosis.

*Abbreviations:* CI, confidence interval; IPF, idiopathic pulmonary fibrosis; PF, pulmonary fibrosis.

**Table 3. Dose-response effect of smoking on the risk of severe pulmonary fibrosis**

| Smoking, pack years* | PF                 | IPF                |
|----------------------|--------------------|--------------------|
|                      | OR (95% CI)        | OR (95% CI)        |
| 0                    | 1                  | 1                  |
| 1 – 9                | 1.03 (0.62 – 1.70) | 0.90 (0.52 – 1.57) |
| 10 – 19              | 2.26 (1.35 – 3.80) | 2.10 (1.20 – 3.68) |
| ≥ 20                 | 2.66 (1.56 – 4.55) | 2.25 (1.26 – 4.02) |

Odds ratios (ORs) for levels of smoking estimated using conditional logistic regression

adjusted for age and stratified for year of birth, year of diagnosis, gender and occupational exposure.

\* Pack years of smoking up to 10 years before the year of PF diagnosis.

*Abbreviations:* IPF, idiopathic pulmonary fibrosis; PF, pulmonary fibrosis.

STROBE 2007 (v4) Statement—Checklist of items that should be included in reports of case-control studies

| Section/Topic             | Item # | Recommendation                                                                                                                                                                       | Reported on page # |
|---------------------------|--------|--------------------------------------------------------------------------------------------------------------------------------------------------------------------------------------|--------------------|
| Title and abstract        | 1      | (a) Indicate the study’s design with a commonly used term in the title or the abstract                                                                                               | Title              |
|                           |        | (b) Provide in the abstract an informative and balanced summary of what was done and what was found                                                                                  | Yes                |
| <b>Introduction</b>       |        |                                                                                                                                                                                      |                    |
| Background/rationale      | 2      | Explain the scientific background and rationale for the investigation being reported                                                                                                 | Yes                |
| Objectives                | 3      | State specific objectives, including any prespecified hypotheses                                                                                                                     | Yes                |
| <b>Methods</b>            |        |                                                                                                                                                                                      |                    |
| Study design              | 4      | Present key elements of study design early in the paper                                                                                                                              | Yes                |
| Setting                   | 5      | Describe the setting, locations, and relevant dates, including periods of recruitment, exposure, follow-up, and data collection                                                      | Yes                |
| Participants              | 6      | (a) Give the eligibility criteria, and the sources and methods of case ascertainment and control selection. Give the rationale for the choice of cases and controls                  | Yes                |
|                           |        | (b) For matched studies, give matching criteria and the number of controls per case                                                                                                  | Yes                |
| Variables                 | 7      | Clearly define all outcomes, exposures, predictors, potential confounders, and effect modifiers. Give diagnostic criteria, if applicable                                             | Yes                |
| Data sources/ measurement | 8*     | For each variable of interest, give sources of data and details of methods of assessment (measurement). Describe comparability of assessment methods if there is more than one group | Yes                |
| Bias                      | 9      | Describe any efforts to address potential sources of bias                                                                                                                            | Yes                |
| Study size                | 10     | Explain how the study size was arrived at                                                                                                                                            | Yes                |
| Quantitative variables    | 11     | Explain how quantitative variables were handled in the analyses. If applicable, describe which groupings were chosen and why                                                         | Yes                |
| Statistical methods       | 12     | (a) Describe all statistical methods, including those used to control for confounding                                                                                                | Yes                |
|                           |        | (b) Describe any methods used to examine subgroups and interactions                                                                                                                  | Yes                |
|                           |        | (c) Explain how missing data were addressed                                                                                                                                          | Yes                |
|                           |        | (d) If applicable, explain how matching of cases and controls was addressed                                                                                                          | Yes                |
|                           |        | (e) Describe any sensitivity analyses                                                                                                                                                | Yes                |
| <b>Results</b>            |        |                                                                                                                                                                                      |                    |

1  
2  
3  
4  
5  
6  
7  
8  
9  
10  
11  
12  
13  
14  
15  
16  
17  
18  
19  
20  
21  
22  
23  
24  
25  
26  
27  
28  
29  
30  
31  
32  
33  
34  
35  
36  
37  
38  
39  
40  
41  
42  
43  
44  
45  
46  
47  
48  
49

|                          |     |                                                                                                                                                                                                              |                                                                                                          |
|--------------------------|-----|--------------------------------------------------------------------------------------------------------------------------------------------------------------------------------------------------------------|----------------------------------------------------------------------------------------------------------|
| Participants             | 13* | (a) Report numbers of individuals at each stage of study—eg numbers potentially eligible, examined for eligibility, confirmed eligible, included in the study, completing follow-up, and analysed            | Yes                                                                                                      |
|                          |     | (b) Give reasons for non-participation at each stage                                                                                                                                                         | Yes                                                                                                      |
|                          |     | (c) Consider use of a flow diagram                                                                                                                                                                           | Yes                                                                                                      |
| Descriptive data         | 14* | (a) Give characteristics of study participants (eg demographic, clinical, social) and information on exposures and potential confounders                                                                     | Yes                                                                                                      |
|                          |     | (b) Indicate number of participants with missing data for each variable of interest                                                                                                                          | Yes                                                                                                      |
| Outcome data             | 15* | Report numbers in each exposure category, or summary measures of exposure                                                                                                                                    | Yes                                                                                                      |
| Main results             | 16  | (a) Give unadjusted estimates and, if applicable, confounder-adjusted estimates and their precision (eg, 95% confidence interval). Make clear which confounders were adjusted for and why they were included | Adjusted analysis presented, biased crude estimates will be added upon request from reviewers or editor. |
|                          |     | (b) Report category boundaries when continuous variables were categorized                                                                                                                                    | Yes                                                                                                      |
|                          |     | (c) If relevant, consider translating estimates of relative risk into absolute risk for a meaningful time period                                                                                             | Yes                                                                                                      |
| Other analyses           | 17  | Report other analyses done—eg analyses of subgroups and interactions, and sensitivity analyses                                                                                                               | Yes                                                                                                      |
| <b>Discussion</b>        |     |                                                                                                                                                                                                              |                                                                                                          |
| Key results              | 18  | Summarise key results with reference to study objectives                                                                                                                                                     | Yes                                                                                                      |
| Limitations              | 19  | Discuss limitations of the study, taking into account sources of potential bias or imprecision. Discuss both direction and magnitude of any potential bias                                                   | Yes                                                                                                      |
| Interpretation           | 20  | Give a cautious overall interpretation of results considering objectives, limitations, multiplicity of analyses, results from similar studies, and other relevant evidence                                   | Yes                                                                                                      |
| Generalisability         | 21  | Discuss the generalisability (external validity) of the study results                                                                                                                                        | Yes                                                                                                      |
| <b>Other information</b> |     |                                                                                                                                                                                                              |                                                                                                          |
| Funding                  | 22  | Give the source of funding and the role of the funders for the present study and, if applicable, for the original study on which the present article is based                                                | Yes                                                                                                      |

\*Give information separately for cases and controls in case-control studies and, if applicable, for exposed and unexposed groups in cohort and cross-sectional studies.

1  
2  
3  
4  
5  
6  
7  
8  
9  
10  
11  
12  
13  
14  
15  
16  
17  
18  
19  
20  
21  
22  
23  
24  
25  
26  
27  
28  
29  
30  
31  
32  
33  
34  
35  
36  
37  
38  
39  
40  
41  
42  
43  
44  
45  
46  
47  
48  
49

**Note:** An Explanation and Elaboration article discusses each checklist item and gives methodological background and published examples of transparent reporting. The STROBE checklist is best used in conjunction with this article (freely available on the Web sites of PLoS Medicine at <http://www.plosmedicine.org/>, Annals of Internal Medicine at <http://www.annals.org/>, and Epidemiology at <http://www.epidem.com/>). Information on the STROBE Initiative is available at [www.strobe-statement.org](http://www.strobe-statement.org).

For peer review only



**Effects of smoking, gender and occupational exposures on the risk of severe pulmonary fibrosis: a population based case-control study**

|                                 |                                                                                                                                                                                                                                                                                                                                                                                                                                                                                                                                                                                                                                                                                                                                                                                                                                                                                          |
|---------------------------------|------------------------------------------------------------------------------------------------------------------------------------------------------------------------------------------------------------------------------------------------------------------------------------------------------------------------------------------------------------------------------------------------------------------------------------------------------------------------------------------------------------------------------------------------------------------------------------------------------------------------------------------------------------------------------------------------------------------------------------------------------------------------------------------------------------------------------------------------------------------------------------------|
| Journal:                        | <i>BMJ Open</i>                                                                                                                                                                                                                                                                                                                                                                                                                                                                                                                                                                                                                                                                                                                                                                                                                                                                          |
| Manuscript ID:                  | bmjopen-2013-004018.R1                                                                                                                                                                                                                                                                                                                                                                                                                                                                                                                                                                                                                                                                                                                                                                                                                                                                   |
| Article Type:                   | Research                                                                                                                                                                                                                                                                                                                                                                                                                                                                                                                                                                                                                                                                                                                                                                                                                                                                                 |
| Date Submitted by the Author:   | 18-Nov-2013                                                                                                                                                                                                                                                                                                                                                                                                                                                                                                                                                                                                                                                                                                                                                                                                                                                                              |
| Complete List of Authors:       | Ekström, Magnus; Department of Clinical Sciences, Division of Respiratory Medicine & Allergology, Lund University, ; Department of Medicine, Blekinge Hospital, Gustafson, Torbjörn; Institution of Public Health and Clinical Medicine, Umeå University, Boman, Kurt; Institution of Public Health and Clinical Medicine, Umeå University, Nilsson, Kenneth; Respiratory Medicine Unit, Department of Medicine Solna, the Karolinska Institute and Karolinska University Hospital, Tornling, Göran; Respiratory Medicine Unit, Department of Medicine Solna, the Karolinska Institute and Karolinska University Hospital, Murgia, Nicola; Section for Occupational Medicine, Respiratory Diseases and Toxicology, University of Perugia, Toren, Kjell; Section for Occupational and Environmental Medicine, Institute of Medicine, Sahlgrenska Academy at the University of Gothenburg, |
| <b>Primary Subject Heading</b>: | Respiratory medicine                                                                                                                                                                                                                                                                                                                                                                                                                                                                                                                                                                                                                                                                                                                                                                                                                                                                     |
| Secondary Subject Heading:      | Epidemiology, Occupational and environmental medicine, Smoking and tobacco                                                                                                                                                                                                                                                                                                                                                                                                                                                                                                                                                                                                                                                                                                                                                                                                               |
| Keywords:                       | Epidemiology < TROPICAL MEDICINE, Thoracic medicine < INTERNAL MEDICINE, Interstitial lung disease < THORACIC MEDICINE                                                                                                                                                                                                                                                                                                                                                                                                                                                                                                                                                                                                                                                                                                                                                                   |
|                                 |                                                                                                                                                                                                                                                                                                                                                                                                                                                                                                                                                                                                                                                                                                                                                                                                                                                                                          |

SCHOLARONE™  
Manuscripts

1  
2  
3 **Effects of smoking, gender and occupational exposure on the risk of severe pulmonary**  
4 **fibrosis: a population based case-control study**  
5  
6

7  
8 Magnus Ekström, MD, PhD<sup>1,2</sup>; Torbjörn Gustafson, MD, PhD<sup>3</sup>; Kurt Boman, MD, PhD<sup>3</sup>;  
9  
10 Kenneth Nilsson, MD, PhD<sup>3</sup>; Göran Tornling, MD, PhD<sup>4</sup>; Nicola Murgia, MD<sup>5</sup>; Kjell Torén,  
11  
12 MD, FCCP, PhD<sup>6</sup>  
13

14  
15  
16  
17  
18  
19 <sup>1</sup> Department of Clinical Sciences, Division of Respiratory Medicine & Allergology, Lund  
20  
21 University, SE-22100 Lund, Sweden  
22

23  
24 <sup>2</sup> Department of Medicine, Blekinge Hospital, SE-371 85 Karlskrona, Sweden  
25

26  
27 <sup>3</sup> Institution of Public Health and Clinical Medicine, Umeå University, SE-901 85 Umeå,  
28  
29 Sweden  
30

31  
32 <sup>4</sup> Respiratory Medicine Unit, Department of Medicine Solna, the Karolinska Institute and  
33  
34 Karolinska University Hospital, SE-171 76 Stockholm, Sweden  
35

36  
37 <sup>5</sup> Section for Occupational Medicine, Respiratory Diseases and Toxicology, University of  
38  
39 Perugia, 06123 Perugia, Italy  
40

41  
42 <sup>6</sup> Section for Occupational and Environmental Medicine, Institute of Medicine, Sahlgrenska  
43  
44 Academy at the University of Gothenburg, SE-405 30 Gothenburg, Sweden  
45

46  
47 **Corresponding author:** Magnus Ekström, Department of Respiratory Medicine, Blekinge  
48  
49 Hospital, SE-371 85 Karlskrona, Sweden. E-mail: [pmekstrom@gmail.com](mailto:pmekstrom@gmail.com). Tel: +46  
50  
51 455731000.  
52

53  
54  
55 **Keywords:** Pulmonary fibrosis; Smoking; Occupational exposure; Mortality; Gender  
56  
57  
58  
59  
60



1  
2  
3 **Running title:** Interacting factors and severe pulmonary fibrosis  
4  
5

6 **Word count:** 2,206  
7  
8  
9  
10  
11  
12  
13  
14  
15  
16  
17  
18  
19  
20  
21  
22  
23  
24  
25  
26  
27  
28  
29  
30  
31  
32  
33  
34  
35  
36  
37  
38  
39  
40  
41  
42  
43  
44  
45  
46  
47  
48  
49  
50  
51  
52  
53  
54  
55  
56  
57  
58  
59  
60

For peer review only

1  
2  
3 Word count of abstract: 197  
4

5 **ABSTRACT**  
6  
7

8 **Objectives:** To estimate the effects of smoking, gender and occupational exposure on the risk  
9  
10 of developing severe pulmonary fibrosis (PF), including dose-response and interaction effects.  
11

12  
13 **Methods:** National case-control study of 171 patients (cases) starting long-term oxygen  
14  
15 therapy (LTOT) for PF in Sweden between February 1997 and April 2000, and 719 random  
16  
17 control subjects from the general population. Of cases, 137 had probable idiopathic  
18  
19 pulmonary fibrosis (IPF). The odds ratios (ORs) for smoking, gender, and occupational  
20  
21 exposure were estimated using Mantel-Haenzel analysis and conditional logistic regression,  
22  
23 controlling for age and year of diagnosis.  
24  
25

26  
27 **Results:** The adverse effect of smoking was amplified by male gender and occupational  
28  
29 exposure, OR 4.6 ([95% confidence interval] 2.1 – 10.3) for PF, and OR 3.0 (1.3 – 6.5) for  
30  
31 IPF, compared to in non-exposed women. Higher cumulative smoking exposure was linearly  
32  
33 associated with increased risks. Compared to smoking less than ten pack-years, smoking  $\geq 20$   
34  
35 pack-years was associated with increased risk of PF and IPF, OR 2.6 (1.4 – 4.9) and OR 2.5  
36  
37 (1.3 – 5.0), respectively.  
38  
39

40  
41 **Conclusion:** Smoking has a dose-related association with increased risk of severe PF. Men  
42  
43 with a history of smoking and occupational exposure is a particular risk group for developing  
44  
45 severe pulmonary fibrosis.  
46  
47  
48  
49  
50  
51  
52  
53  
54  
55  
56  
57  
58  
59  
60

## ARTICLE SUMMARY

### Article focus

- Smoking, male gender and occupational exposures are proposed risk factors for developing severe idiopathic pulmonary disease (IPF), but data on the interplay between these factors are limited.
- This study aims to estimate the effects of smoking, gender and occupational exposure on the risk of developing severe IPF, including interactions and dose-response effects.

### Key messages

- Smoking has a dose-response association with increased risk of severe IPF.
- The adverse effect of smoking is strongly amplified by male gender and occupational exposure. This study identifies men with a history of smoking and occupational exposures as a particular risk group for developing severe IPF.

### Strengths and limitations

- Population-based case-control study of subjects developing oxygen-dependent pulmonary in Sweden with randomly selected controls from the general population.
- Analysis of detailed exposure data, accounting for confounders and lag time between exposure and disease.
- As the underlying etiology may be difficult to ascertain in patients with oxygen-dependent pulmonary fibrosis, IPF was defined through review of national administrative register data and individual medical records.

## BACKGROUND

Pulmonary fibrosis (PF) constitutes a range of conditions that are either secondary to diseases or factors, such as systemic inflammatory disease and drug therapies, or primary, of which the most common is idiopathic pulmonary fibrosis (IPF).<sup>1</sup>

IPF is a chronic, progressive, fibrosing interstitial lung disease with a high risk of rapid progression and mortality.<sup>2</sup> Median survival after diagnosis is approximately two years.<sup>2</sup> The incidence of IPF has increased over time, with marked regional differences suggesting the pathogenic role of various environmental and occupational exposures.<sup>3</sup>

The etiology of IPF remains unknown.<sup>2</sup> The majority of IPF patients are men with a history of current or past smoking.<sup>2</sup> Most case-control studies have suggested an association between smoking and an increased risk of IPF,<sup>4-7</sup> although one study reported no such association.<sup>8</sup>

This inconsistency is most likely due to differences in study settings, the included covariates and, in some studies, the use of hospital patients as control subjects, which might have biased the smoking estimates.<sup>4 7 9-11</sup> Occupational exposures, including metal, stone and wood dust, have been linked to higher risks of developing IPF.<sup>12</sup>

It is unknown if there are interactions between smoking, gender, and occupational exposure, and the risk of developing IPF. The only two studies which analyzed interactions reported a tendency towards an amplified IPF risk in patients with a history of smoking and occupational exposure, but the studies failed to establish statistically significant interactions.<sup>6,13</sup> Moreover, it is unclear if smoking really is an etiologic factor for IPF, as studies included low numbers of patients, and data on whether there is a dose-dependent relation between smoking and the risk of IPF are limited.

1  
2  
3 The aim of the present nationwide case-control study was therefore to estimate the  
4  
5 associations between smoking, gender, occupational exposure, and the risk of developing  
6  
7 severe pulmonary fibrosis.  
8  
9

## 16 **METHODS**

19 This was a national, register-based case-control study. Patients starting long-term oxygen  
20  
21 therapy (LTOT) for PF between 1 February 1997 and 4 April 2000 in the national Swedevox  
22  
23 register were eligible for inclusion as cases. The Swedevox register covers some 85% of all  
24  
25 patients starting LTOT in Sweden.<sup>13</sup> Details of the study design and a previous analysis using  
26  
27 the same data set have been published.<sup>14</sup> Data was collected through an extensive postal  
28  
29 questionnaire on smoking, occupational exposure (including fibers, fumes, gas, mineral dust,  
30  
31 organic dust, and vapours) and diagnosis of PF. The questionnaire has been described in detail  
32  
33 elsewhere.<sup>15</sup> Smoking data included the year of starting smoking, date of stopping smoking,  
34  
35 and the mean number of smoked cigarettes per day during each ten year period between ages  
36  
37 15 – 65 years, and the mean exposure after age 65.<sup>15</sup> Occupational data included the presence,  
38  
39 start year, stop year and intensity (hours per week) for any occupational exposure, and  
40  
41 exposure to birds (both at work and at home), metal dust, and wood dust. Occupational  
42  
43 exposure was defined as any exposure ten or more years before the date of the PF diagnosis,  
44  
45 allowing for a ten year lag-time between exposures and developing the disease.  
46  
47  
48  
49

50  
51 After the exclusion of patients who were incorrectly registered (n = 12; 5%) or did not  
52  
53 respond to the questionnaire (n=58; 24%), 171 PF cases were included in the analysis.  
54  
55  
56  
57  
58  
59  
60

1  
2  
3 Patients with probable idiopathic pulmonary fibrosis (IPF cases, n = 137) were identified  
4 through a review of each patient's medical record done independently by specialists in  
5 respiratory medicine (KN, TG).<sup>14</sup> High-resolution computed tomography (HRCT) was  
6 performed in 41% of PF patients, CT in an additional 10%, and trans-bronchial and open lung  
7 biopsy was performed in 6%, respectively. The IPF cohort excluded patients with an  
8 identifiable or probable cause of PF: rheumatic or systemic inflammatory diseases (20% of PF  
9 cases), pneumoconiosis (6%), medications or irradiation (2%).<sup>14</sup>  
10  
11  
12  
13  
14  
15  
16  
17  
18

19 Control subjects were selected as a random sample (n = 1000) from the general population of  
20 the same age range as the PF patients. Of the control subjects, 719 (72%) returned complete  
21 exposure data and were included in the analysis.  
22  
23  
24  
25  
26  
27  
28  
29

### 30 **Ethics Statement**

31  
32 All participants gave their informed consent to participate. The study was approved by all the  
33 relevant ethics committees in Sweden, the Swedish National Board of Health and Welfare,  
34 and the Data Inspection Board.  
35  
36  
37  
38  
39  
40  
41  
42

### 43 **Statistical Analysis**

44  
45 Cases and control subjects were categorized according to year of birth (1906 – 1923, 1924 –  
46 1936 or 1937 – 1969) and cases according to year they received their PF diagnosis (1968–  
47 1986, 1987–1993 or 1994–1999). Control subjects were assigned a time point corresponding  
48 to the year patients received their PF diagnosis, using a method described previously.<sup>14 15</sup>  
49  
50  
51  
52

53 First, control subjects within each birth year group were assigned a random diagnosis year  
54 group, weighted by the number of cases in each diagnosis year group. Then, the year of PF  
55  
56  
57  
58  
59  
60

1  
2  
3 diagnosis of each control subject was set to the mid-year of the corresponding year of the  
4 patient group. Characteristics at baseline (the date the questionnaire was filled in) were  
5 presented using frequencies and percentages for categorical variables. Continuous data were  
6 presented using mean with standard deviation (SD) and median with range or interquartile  
7 range (IQR) for variables with normal and skewed distribution, respectively.  
8  
9  
10  
11  
12

13  
14 Smoking status and cumulative smoking exposure, calculated as pack years ([mean number of  
15 cigarettes per day] / 20 x [years of exposure]), were recorded up to 10 years prior to the date  
16 of the PF diagnosis (a 10-year time lag), allowing time between smoke exposure and the  
17 development of oxygen-dependent PF.  
18  
19  
20  
21  
22

23  
24 Associations between smoking and the risk of developing oxygen-dependent PF and IPF, and  
25 the interactions between smoking, occupational exposure and gender were estimated and  
26 reported using Mantel-Haenzel analysis, controlling for year of birth, year of diagnosis and  
27 gender, as applicable. Interactions were also analyzed using conditional logistic regression,  
28 stratified for year of birth, year of diagnosis, gender, with adjustment for age and pack-years  
29 of smoking. All estimates were consistent between Mantel-Haenzel analysis and the  
30 conditional logistic models.  
31  
32  
33  
34  
35  
36  
37  
38

39  
40 Associations were expressed as odds ratios (ORs) with 95% confidence intervals (CIs).

41  
42 Statistical significance was defined as a double-sided  $p < 0.05$ . Statistical analyses were  
43 performed using Stata version 11.1 (StataCorp LP; College Station, TX) and SAS version 9.2  
44 (SAS Institute, Inc., Cary, NC).  
45  
46  
47  
48  
49  
50  
51  
52  
53  
54  
55

## 56 RESULTS

57  
58  
59  
60

1  
2  
3 We included 171 patients with PF, of whom 137 were classified as having IPF, and 719  
4  
5 control subjects. Baseline characteristics are shown in Table 1. Among PF cases, the rate of  
6  
7 any occupational exposure was higher in men than in women (80% vs. 52 %;  $p < 0.001$ ).  
8  
9 Men also had higher smoking exposure. Ten years before the PF diagnosis, 90 (84%) men  
10  
11 were ever-smokers with a median 10 (IQR, 3 – 23) pack years, compared to 29 (45%) women  
12  
13 with a median 8 (IQR, 3 – 15) pack years. A similar difference was seen for IPF cases.  
14  
15  
16  
17  
18  
19

### 20 **Interactions**

21  
22  
23 There was a significant interaction between smoking, occupational exposure and gender, and  
24  
25 the risk of developing oxygen-dependent PF (test of homogeneity,  $p = 0.028$ ). The interaction  
26  
27 was similar in the IPF cohort (Table 2). Men with current or past smoking and occupational  
28  
29 exposure had markedly increased risk of PF, OR 4.6 (2.1 – 10.3), and IPF, OR 3.0 (1.3 – 6.5),  
30  
31 compared to non-exposed women (Table 2). Adjustment for differences in pack years  
32  
33 between men and women, in addition to the other covariates, did not affect the estimates.  
34  
35  
36  
37  
38  
39

### 40 **Dose-response effect**

41  
42  
43 There was a linear association between higher cumulative smoking exposure (up to ten years  
44  
45 before diagnosis) and increased risk of PF and IPF, OR 1.03 (95% CI, 1.01 – 1.04) per pack  
46  
47 year and OR 1.02 (95% CI, 1.01 – 1.04) per pack year, respectively. Compared to lower  
48  
49 levels of smoking (1 – 9 pack years), heavy smoking ( $\geq 20$  pack years) was associated with an  
50  
51 increased risk of PF, OR 2.6 (95% CI, 1.4 – 4.9), and IPF, OR 2.5 (95% CI, 1.3 – 5.0), as  
52  
53 shown in Table 3. Using a 5-year time lag for smoking exposure instead of 10 years resulted  
54  
55 in similar estimates.  
56  
57  
58  
59  
60



### Subtypes of occupational exposure

The effect of occupational exposure seemed to be mediated partly through exposure to birds and wood dust. The risk of PF was increased by exposure to birds (OR 1.9; 95% CI, 1.0 – 3.7) and wood dust (OR 1.7; 95% CI, 1.0 – 3.0), controlling for age, gender, year of diagnosis, and smoking. There were no evidence of effects of inorganic dust (OR 1.3; 95% CI, 0.8 – 2.0) or metal dust (OR 1.1; 95% CI, 0.6 – 1.8). There were signs of interactions with smoking and gender for exposure to birds ( $p = 0.021$ ) and wood dust ( $p = 0.023$ ), respectively. Estimates were similar for the IPF cohort, except for a lower effect of bird exposure (OR 1.3; 95% CI, 0.6 – 2.8).

### DISCUSSION

The main findings are that 1) smoking was a risk determinant in the development of oxygen-dependent pulmonary fibrosis and that this risk was amplified by male gender and occupational exposure; 2) the association with smoking was dose-dependent, which may support the theory of the causative role of smoking in the pathogenesis of severe pulmonary fibrosis.

Our findings are consistent with reports of increased risk of IPF associated with smoking<sup>4-6 10</sup> and occupational exposures.<sup>4-7 9 12 14 16</sup> A previous analysis using the present data set showed that specific occupational factors associated with an increased risk of PF included exposure to birds and wood dust.<sup>14</sup> Studies of a possible dose-response correlation between smoking and IPF have shown conflicting results, with two studies indicating a dose-dependent

1  
2  
3 effect<sup>5 6</sup> and one study showing no dose correlation.<sup>17</sup> The latter study, however, analyzed  
4  
5 only smoking status and the current smoking dose (cigarettes per day) and not cumulative  
6  
7 smoking exposure such as pack years.<sup>17</sup> The present study extends the previous observations  
8  
9 by demonstrating that the association between smoking and severe pulmonary fibrosis is  
10  
11 dose-dependent and is modified by gender and occupational exposure.  
12  
13

14  
15 A strength of the present study is that it included cases from a population-based prospective  
16  
17 register of patients starting LTOT in Sweden. Control subjects were randomly selected from  
18  
19 the general population. Previous studies using control subjects in hospitals may have yielded  
20  
21 biased estimates, as the risk of hospitalization is likely to be related to occupational factors  
22  
23 and smoking.<sup>4 7 9-11</sup> We had detailed data on the temporality, dose and duration of smoking. In  
24  
25 contrast with previous studies, only exposure data up to ten years before the year of the PF  
26  
27 diagnosis was included in the analysis to avoid reverse causation and to allow for the time lag  
28  
29 between exposure to risk factors and the manifestation of clinical disease.  
30  
31

32  
33 A possible limitation is that the self-reported exposure data could be influenced by recall bias.  
34  
35 The validity of the exposure classification was, however, supported by a high degree of  
36  
37 consistency between reported employment histories and occupational exposure to specific  
38  
39 agents.<sup>14</sup> Second, the association between smoking and starting LTOT could be affected by  
40  
41 survivor bias, as smokers are likely to be at high risk of dying of other smoke-related disease,  
42  
43 such as cancer and cardiovascular disease, before they can develop severe IPF. Also, stopping  
44  
45 smoking is a mandatory criterion for starting LTOT. Both these potential biases would tend to  
46  
47 lower the number of smokers starting LTOT and to underestimate the association between  
48  
49 smoking and oxygen-dependent PF. Third, the IPF diagnosis could be misclassified in some  
50  
51 patients, especially as the cohort was collected prior to the publication of main consensus  
52  
53 definition of IPF.<sup>1</sup> The validity of the PF and IPF diagnoses was checked by respiratory  
54  
55 physicians using medical records, including available radiographic and histologic data.<sup>14</sup>  
56  
57  
58  
59  
60

1  
2  
3 Among idiopathic interstitial pneumonias, IPF is the most common condition and it is  
4 associated with a high risk of progression to hypoxemic respiratory failure and death.<sup>1 18</sup> Thus,  
5 the prevalence of IPF is likely high in oxygen-dependent pulmonary fibrosis. It is possible  
6 that we included patients with combined PF and emphysema, which may be present in up to  
7 one third of IPF patients.<sup>19</sup> Concurrent emphysema may constitute a smoking-related  
8 comorbidity or a distinct IPF phenotype,<sup>19</sup> and could explain, at least partly, the association  
9 between smoking, male gender, and the development of severe IPF in the present study. We  
10 included the PF cohort in the analysis, as it may be difficult to obtain a specific diagnosis in  
11 patients with advanced pulmonary fibrosis in the clinic. Findings were similar in the PF and  
12 IPF cohorts, which supports the validity of the analysis. Using national population based cases  
13 and controls, the present findings likely have high applicability to severe PF in Swedish  
14 clinical practice. The validity to other settings may be lower owing to differences in socio-  
15 demographics factors, health care organization, and pattern of exposure.  
16  
17  
18  
19  
20  
21  
22  
23  
24  
25  
26  
27  
28  
29  
30

31  
32 Mechanisms governing the relationship between smoking, gender, occupational exposure,  
33 and the development of severe pulmonary fibrosis are unknown but likely involve complex  
34 interactions between different environmental factors in genetically predisposed individuals.<sup>20</sup>  
35  
36  
37 The adverse effect of smoking could in part be attributable to the development of concurrent  
38 emphysema, which has been associated with hypoxemia and earlier death in IPF.<sup>21</sup>  
39  
40  
41  
42  
43

44 For the clinician, this study identifies a group of male, heavy smokers with occupational  
45 exposure to harmful substances, who have a greatly increased risk of developing severe  
46 pulmonary fibrosis. In this group, interventions to help people reduce or stop smoking are a  
47 top priority.  
48  
49  
50  
51  
52  
53  
54  
55  
56  
57  
58  
59  
60

1  
2  
3 In conclusion, smoking is associated with a dose-dependent increase in oxygen-dependent  
4 pulmonary fibrosis. The adverse effects of smoking are stronger in men and in people with  
5 occupational exposure.  
6  
7  
8  
9

## 10 11 12 13 **ACKNOWLEDGEMENTS**

14  
15  
16 **Author contributions:** ME had full access to all the data in the study and takes full  
17 responsibility for the integrity of the data and the accuracy of the data analysis. Conception  
18 and design: KB, KN, GT, KT; Acquisition of data: TG, KB, KN, GT, KT; Analysis and  
19 interpretation of data: ME, TG, NM, KT; Drafting the article: ME, TG, KT; Revising it for  
20 important intellectual content and approval of the version to be published: ME, TG, KB, KN,  
21  
22  
23  
24  
25  
26  
27  
28  
29  
30  
31  
32  
33  
34  
35  
36  
37  
38  
39  
40  
41  
42  
43  
44  
45  
46  
47  
48  
49  
50  
51  
52  
53  
54  
55  
56  
57  
58  
59  
60  
GT, NM, KT.

**Funding:** This study was funded by the Research Council of Blekinge, the Swedish National  
Board of Health and Welfare, and the Swedish Heart-Lung Foundation.

**Conflicts of interest:** No conflicts of interest exist for the authors.

**Other contributions:** The authors thank Kerstin Ström for her invaluable help and inspiration  
throughout the study process, and the doctors and nurses who cared for the patients.

**Data sharing statement:** Analysis code is available from the corresponding author.

## References

- 1 American Thoracic Society/European Respiratory Society International Multidisciplinary Consensus Classification of the Idiopathic Interstitial Pneumonias. This joint statement of the American Thoracic Society (ATS), and the European Respiratory Society (ERS) was adopted by the ATS board of directors, June 2001 and by the ERS Executive Committee, June 2001. *Am J Respir Crit Care Med* 2002;165:277-304.
- 2 Raghu G, Collard HR, Egan JJ et al. An official ATS/ERS/JRS/ALAT statement: idiopathic pulmonary fibrosis: evidence-based guidelines for diagnosis and management. *American Journal of Respiratory and Critical Care Medicine* 2011;183:788-824.
- 3 Navaratnam V, Fleming KM, West J et al. The rising incidence of idiopathic pulmonary fibrosis in the U.K. *Thorax* 2011;66:462-7.
- 4 Iwai K, Mori T, Yamadaa N, Yamaguchi M, et al. Idiopathic pulmonary fibrosis. Epidemiologic approaches to occupational exposure. *American Journal of Respiratory and Critical Care Medicine* 1994;150:670-5.
- 5 Hubbard R, Lewis S, Richards K, et al. Occupational exposure to metal or wood dust and aetiology of cryptogenic fibrosing alveolitis. *Lancet* 1996;347:284-9.
- 6 Baumgartner KB, Samet JM, Stidley CA, Colby TV, Waldron JA. Cigarette smoking: a risk factor for idiopathic pulmonary fibrosis. *American Journal of Respiratory and Critical Care Medicine* 1997;155:242-8.
- 7 Miyake Y, Sasaki S, Yokoyama T et al. Occupational and environmental factors and idiopathic pulmonary fibrosis in Japan. *The Annals of occupational hygiene* 2005;49:259-65.
- 8 Scott J, Johnston I, Britton J. What causes cryptogenic fibrosing alveolitis? A case-control study of environmental exposure to dust. *BMJ* 1990;301:1015-7.
- 9 Awadalla NJ, Hegazy A, Elmetwally RA, et al. Occupational and environmental risk factors for idiopathic pulmonary fibrosis in Egypt: a multicenter case-control study. *Int J Occup Environ Med* 2012;3:107-16.
- 10 Garcia-Sancho Figueroa MC, Carrillo G, Perez-Padilla R et al. Risk factors for idiopathic pulmonary fibrosis in a Mexican population. A case-control study. *Respir Med* 2010;104:305-9.
- 11 Miyake Y, Sasaki S, Yokoyama T et al. Case-control study of medical history and idiopathic pulmonary fibrosis in Japan. *Respirology* 2005;10:504-9.
- 12 Taskar VS, Coultas DB. Is idiopathic pulmonary fibrosis an environmental disease? *Proceedings of the American Thoracic Society* 2006;3:293-8.
- 13 Strom K, Boe J. A national register for long-term oxygen therapy in chronic hypoxia: preliminary results. *Eur Respir J* 1988;1:952-8.
- 14 Gustafson T, Dahlman-Hoglund A, Nilsson K, et al. Occupational exposure and severe pulmonary fibrosis. *Respir Med* 2007;101:2207-12.
- 15 Toren K, Jarvholm B, Brisman J, et al. Adult-onset asthma and occupational exposures. *Scand J Work Environ Health* 1999;25:430-5.
- 16 Baumgartner KB, Samet JM, Coultas DB et al. Occupational and environmental risk factors for idiopathic pulmonary fibrosis: a multicenter case-control study. Collaborating Centers. *Am J Epidemiol* 2000;152:307-15.
- 17 Gribbin J, Hubbard R, Smith C. Role of diabetes mellitus and gastro-oesophageal reflux in the aetiology of idiopathic pulmonary fibrosis. *Respir Med* 2009;103:927-31.
- 18 Bjoraker JA, Ryu JH, Edwin MK et al. Prognostic significance of histopathologic subsets in idiopathic pulmonary fibrosis. *Am J Respir Crit Care Med* 1998;157:199-203.
- 19 Cottin V. The impact of emphysema in pulmonary fibrosis. *European Respiratory Review* 2013;22:153-157.
- 20 Macneal K, Schwartz DA. The genetic and environmental causes of pulmonary fibrosis. *Proc Am Thorac Soc* 2012;9:120-5.

- 21 Mejia M, Carrillo G, Rojas-Serrano J et al. Idiopathic pulmonary fibrosis and emphysema: decreased survival associated with severe pulmonary arterial hypertension. *Chest* 2009;136:10-5.

## TABLES

**Table 1. Patient characteristics**

| Characteristic                 | PF cases<br>(n = 171) | IPF cases<br>(n = 137) | Controls<br>(n = 719) |
|--------------------------------|-----------------------|------------------------|-----------------------|
| Age                            | 73.7 ± 9.5            | 74.2 ± 9.8             | 64.3 ± 13.7           |
| Males, n (%)                   | 107 (63)              | 86 (63)                | 337 (47)              |
| Never-smokers, n (%)           | 52 (30)               | 44 (32)                | 344 (48)              |
| Ex-smokers, n (%)              | 114 (67)              | 89 (65)                | 251 (35)              |
| Current smokers, n (%)         | 5 (3)                 | 4 (3)                  | 124 (17)              |
| Smoking exposure, n (%) *      | 119 (70)              | 93 (68)                | 375 (52)              |
| 1 – 9 pack years               | 29 (17)               | 22 (16)                | 176 (24)              |
| 10 – 19 pack years             | 34 (20)               | 27 (20)                | 91 (13)               |
| ≥ 20 pack years                | 36 (21)               | 27 (20)                | 62 (9)                |
| Occupational exposure, n (%) * | 119 (70)              | 93 (68)                | 397 (55)              |
| Birds                          | 16 (9)                | 11 (8)                 | 33 (5)                |
| Inorganic dust                 | 55 (32)               | 40 (29)                | 164 (23)              |

|              |         |         |          |
|--------------|---------|---------|----------|
| Metal dust   | 35 (20) | 27 (19) | 119 (17) |
| Organic dust | 67 (39) | 52 (38) | 182 (25) |
| Wood dust    | 32 (18) | 25 (18) | 57 (8)   |

Data presented as mean  $\pm$  standard deviation unless otherwise specified.

\* Exposure earlier than 10 years before PF diagnosis (ten year lag time).

*Abbreviations:* IPF, idiopathic pulmonary fibrosis; PF, pulmonary fibrosis.

**Table 2. Effect of smoking on the adjusted risk of pulmonary fibrosis, according to gender and occupational exposure**

|                          | PF                  |                     | IPF                 |                    |
|--------------------------|---------------------|---------------------|---------------------|--------------------|
|                          | Odds ratio (95% CI) |                     | Odds ratio (95% CI) |                    |
|                          | Women               | Men                 | Women               | Men                |
| No occupational exposure | 1.10 (0.50 – 2.42)  | 1.97 (0.64 – 6.13)  | 1.12 (0.49 – 2.59)  | 1.44 (0.43 – 4.83) |
| Occupational exposure    | 1.10 (0.52 – 2.34)  | 4.63 (2.08 – 10.33) | 1.32 (0.58 – 3.03)  | 2.96 (1.34 – 6.52) |

Odds ratios (95% confidence interval) for the effect of smoking vs. no smoking on the risk of developing PF and IPF, estimated using Mantel Haenzel analysis controlled for year of birth and year of diagnosis. Smoking was defined as the presence of ever-smoking earlier than 10 years before the diagnosis.

*Abbreviations:* CI, confidence interval; IPF, idiopathic pulmonary fibrosis; PF, pulmonary fibrosis.



**Table 3. Dose-response effect of smoking on the risk of severe pulmonary fibrosis**

| Smoking, pack years* | PF                 | IPF                |
|----------------------|--------------------|--------------------|
|                      | OR (95% CI)        | OR (95% CI)        |
| 0                    | 1                  | 1                  |
| 1 – 9                | 1.03 (0.62 – 1.70) | 0.90 (0.52 – 1.57) |
| 10 – 19              | 2.26 (1.35 – 3.80) | 2.10 (1.20 – 3.68) |
| ≥ 20                 | 2.66 (1.56 – 4.55) | 2.25 (1.26 – 4.02) |

Odds ratios (ORs) for levels of smoking estimated using conditional logistic regression adjusted for age and stratified for year of birth, year of diagnosis, gender and occupational exposure.

\* Pack years of smoking up to 10 years before the year of PF diagnosis.

*Abbreviations:* IPF, idiopathic pulmonary fibrosis; PF, pulmonary fibrosis.

1  
2  
3  
4  
5  
6  
7 **Effects of smoking, gender and occupational exposure on the risk of severe pulmonary**  
8 **fibrosis: a population based case-control study**  
9

10 Magnus Ekström, MD, PhD<sup>1,2</sup>; Torbjörn Gustafson, MD, PhD<sup>3</sup>; Kurt Boman, MD, PhD<sup>3</sup>;  
11 Kenneth Nilsson, MD, PhD<sup>3</sup>; Göran Tornling, MD, PhD<sup>4</sup>; Nicola Murgia, MD<sup>5</sup>; Kjell Torén,  
12 MD, FCCP, PhD<sup>6</sup>  
13  
14  
15  
16  
17  
18  
19

20 <sup>1</sup> Department of Clinical Sciences, Division of Respiratory Medicine & Allergology, Lund  
21 University, SE-22100 Lund, Sweden  
22  
23

24 <sup>2</sup> Department of Medicine, Blekinge Hospital, SE-371 85 Karlskrona, Sweden  
25  
26

27 <sup>3</sup> Institution of Public Health and Clinical Medicine, Umeå University, SE-901 85 Umeå,  
28 Sweden  
29  
30

31 <sup>4</sup> Respiratory Medicine Unit, Department of Medicine Solna, the Karolinska Institute and  
32 Karolinska University Hospital, SE-171 76 Stockholm, Sweden  
33  
34

35 <sup>5</sup> Section for Occupational Medicine, Respiratory Diseases and Toxicology, University of  
36 Perugia, 06123 Perugia, Italy  
37  
38

39 <sup>6</sup> Section for Occupational and Environmental Medicine, Institute of Medicine, Sahlgrenska  
40 Academy at the University of Gothenburg, SE-405 30 Gothenburg, Sweden  
41  
42  
43

44 **Corresponding author:** Magnus Ekström, Department of Respiratory Medicine, Blekinge  
45 Hospital, SE-371 85 Karlskrona, Sweden. E-mail: [pmekstrom@gmail.com](mailto:pmekstrom@gmail.com). Tel: +46  
46 455731000.  
47  
48  
49  
50

51 **Keywords:** Pulmonary fibrosis; Smoking; Occupational exposure; Mortality; Gender  
52  
53  
54  
55  
56  
57  
58  
59  
60

1  
2  
3  
4  
5  
6  
7  
8  
9  
10  
11  
12  
13  
14  
15  
16  
17  
18  
19  
20  
21  
22  
23  
24  
25  
26  
27  
28  
29  
30  
31  
32  
33  
34  
35  
36  
37  
38  
39  
40  
41  
42  
43  
44  
45  
46  
47  
48  
49  
50  
51  
52  
53  
54  
55  
56  
57  
58  
59  
60

**Running title:** Interacting factors and severe pulmonary fibrosis

**Word count:** 24,206865

For peer review only

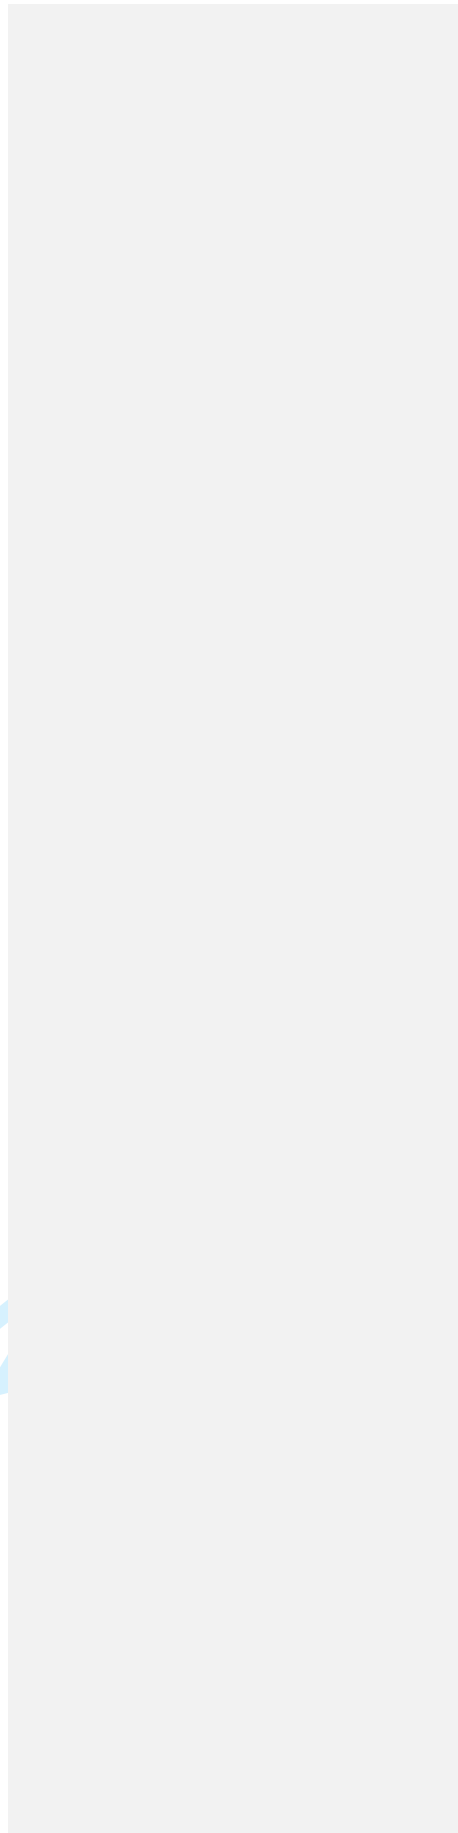

Word count of abstract: 1978

## ABSTRACT

**Objectives:** To estimate the effects of smoking, gender and occupational exposure on the risk of developing severe pulmonary fibrosis (PF), including dose-response and interaction effects.

**Methods:** National case-control study of 171 patients (cases) starting long-term oxygen therapy (LTOT) for PF in Sweden between February 1997 and April 2000, and 719 random control subjects from the general population. Of cases, 137 had probable idiopathic pulmonary fibrosis (IPF). The odds ratios (ORs) for smoking, gender, and occupational exposure were estimated using Mantel-Haenzel analysis and conditional logistic regression, controlling for age and year of diagnosis.

**Results:** The adverse effect of smoking was amplified by male gender and occupational exposure, OR 4.6 ([95% confidence interval] 2.1 – 10.3) for PF, and OR 3.0 (1.3 – 6.5) for IPF, compared to in non-exposed women. Higher cumulative smoking exposure was linearly associated with increased risks. Compared to smoking less than ten pack-years, smoking  $\geq 20$  pack-years was associated with increased risk of PF and IPF, OR 2.6 (1.4 – 4.9) and OR 2.5 (1.3 – 5.0), respectively.

**Conclusion:** Smoking has a dose-related association with increased risk of severe PF. Men with a history of smoking and occupational exposure is a particular risk group for developing severe pulmonary fibrosis.

## ARTICLE SUMMARY

### Article focus

- Smoking, male gender and occupational exposures are proposed risk factors for developing severe idiopathic pulmonary disease (IPF), but data on the interplay between these factors are limited.
- This study aims to estimate the effects of smoking, gender and occupational exposure on the risk of developing severe IPF, including interactions and dose-response effects.

### Key messages

- Smoking has a dose-response association with increased risk of severe IPF.
- The adverse effect of smoking is strongly amplified by male gender and occupational exposure. This study identifies men with a history of smoking and occupational exposures as a particular risk group for developing severe IPF.

### Strengths and limitations

- Population-based case-control study of subjects developing oxygen-dependent pulmonary in Sweden with randomly selected controls from the general population.
- Analysis of detailed exposure data, accounting for confounders and lag time between exposure and disease.
- As the underlying etiology may be difficult to ascertain in patients with oxygen-dependent pulmonary fibrosis, IPF was defined through review of national administrative register data and individual medical records.

## BACKGROUND

Pulmonary fibrosis (PF) constitutes a range of conditions that are either secondary to diseases or factors, such as systemic inflammatory disease and drug therapies, or primary, of which the most common is idiopathic pulmonary fibrosis (IPF).<sup>1</sup>

IPF is a chronic, progressive, fibrosing interstitial lung disease with a high risk of rapid progression and mortality.<sup>2</sup> Median survival after diagnosis is approximately two years.<sup>2</sup> The incidence of IPF has increased over time, with marked regional differences suggesting the pathogenic role of various environmental and occupational exposures.<sup>3</sup>

The etiology of IPF remains unknown.<sup>2</sup> The majority of IPF patients are men with a history of current or past smoking.<sup>2</sup> Most case-control studies have suggested an association between smoking and an increased risk of IPF,<sup>4-7</sup> although one study reported no such association.<sup>8</sup> This inconsistency is most likely due to differences in study settings, the included covariates and, in some studies, the use of hospital patients as control subjects, which might have biased the smoking estimates.<sup>4 7 9-11</sup> Occupational exposures, including metal, stone and wood dust, have been linked to higher risks of developing IPF.<sup>12</sup>

It is unknown if there are interactions between smoking, gender, and occupational exposure, and the risk of developing IPF. The only two studies which analyzed interactions reported a tendency towards an amplified IPF risk in patients with a history of smoking and occupational exposure, but the studies failed to establish statistically significant interactions.<sup>6,13</sup> Moreover, it is unclear if smoking really is an etiologic factor for IPF, as studies included low numbers of patients, and data on whether there is a dose-dependent relation between smoking and the risk of IPF are limited.

1  
2  
3  
4  
5  
6  
7 The aim of the present nationwide case-control study was therefore to estimate the  
8 associations between smoking, gender, occupational exposure, and the risk of developing  
9 severe pulmonary fibrosis.  
10  
11  
12  
13  
14  
15  
16  
17

## 18 METHODS

19  
20 This was a national, register-based case-control study. Patients starting long-term oxygen  
21 therapy (LTOT) for PF between 1 February 1997 and 4 April 2000 in the national Swedevox  
22 register were eligible for inclusion as cases. The Swedevox register covers some 85% of all  
23 patients starting LTOT in Sweden.<sup>13</sup> Details of the study design and a previous analysis using  
24 the same data set have been published.<sup>14</sup> Data was collected through an extensive postal  
25 questionnaire on smoking, occupational exposure (including fibers, fumes, gas, mineral dust,  
26 organic dust, and vapours) and diagnosis of PF. The questionnaire has been described in detail  
27 elsewhere.<sup>15</sup> Smoking data included the year of starting smoking, date of stopping smoking,  
28 and the mean number of smoked cigarettes per day during each ten year period between ages  
29 15 – 65 years, and the mean exposure after age 65.<sup>15</sup> Occupational data included the presence,  
30 start year, stop year and intensity (hours per week) for any occupational exposure, and  
31 exposure to birds (both at work and at home), metal dust, and wood dust. Occupational  
32 exposure was defined as any exposure ten or more years before the date of the PF diagnosis,  
33 allowing for a ten year lag-time between exposures and developing the disease.  
34  
35  
36  
37  
38  
39  
40  
41  
42  
43  
44  
45  
46  
47

48 After the exclusion of patients who were incorrectly registered (n = 12; 5%) or did not  
49 respond to the questionnaire (n=58; 24%), 171 PF cases were included in the analysis.  
50  
51  
52  
53  
54  
55  
56  
57  
58  
59  
60

1  
2  
3  
4  
5  
6  
7 Patients with probable idiopathic pulmonary fibrosis (IPF cases, n = 137) were identified  
8 through a review of each patient's medical record done independently by specialists in  
9 respiratory medicine (KN, TG).<sup>14</sup> High-resolution computed tomography (HRCT) was  
10 performed in 41% of PF patients, CT in an additional 10%, and trans-bronchial and open lung  
11 biopsy was performed in 6%, respectively. The IPF cohort excluded cases in the study  
12 included only patients without with any identifiable or probable cause of PF: (rheumatic or  
13 systemic inflammatory diseases (20% of PF cases), infection, pneumoconiosis (6%),  
14 medications or, irradiation (2%), rheumatic or systemic inflammatory diseases\_etc.)<sup>14</sup>  
15  
16  
17  
18  
19  
20  
21  
22

23 Control subjects were selected as a random sample (n = 1000) from the general population of  
24 the same age range as the PF patients. Of the control subjects, 719 (72%) returned complete  
25 exposure data and were included in the analysis.  
26  
27  
28  
29  
30  
31

### 32 **Ethics Statement**

33  
34 All participants gave their informed consent to participate. The study was approved by all the  
35 relevant ethics committees in Sweden, the Swedish National Board of Health and Welfare,  
36 and the Data Inspection Board.  
37  
38  
39  
40  
41  
42

### 43 **Statistical Analysis**

44  
45 Cases and control subjects were categorized according to year of birth (1906 – 1923, 1924 –  
46 1936 or 1937 – 1969) and cases according to year they received their PF diagnosis (1968–  
47 1986, 1987–1993 or 1994–1999). Control subjects were assigned a time point corresponding  
48 to the year patients received their PF diagnosis, using a method described previously.<sup>14 15</sup>  
49  
50  
51  
52  
53  
54 First, control subjects within each birth year group were assigned a random diagnosis year  
55  
56  
57  
58  
59  
60



1  
2  
3  
4  
5  
6  
7 group, weighted by the number of cases in each diagnosis year group. Then, the year of PF  
8 diagnosis of each control subject was set to the mid-year of the corresponding year of the  
9 patient group. Characteristics at baseline (the date the questionnaire was filled in) were  
10 presented using frequencies and percentages for categorical variables. Continuous data were  
11 presented using mean with standard deviation (SD) and median with range or interquartile  
12 range (IQR) for variables with normal and skewed distribution, respectively.  
13  
14  
15  
16  
17

18  
19 Smoking status and cumulative smoking exposure, calculated as pack years ([mean number of  
20 cigarettes per day] / 20 x [years of exposure]), were recorded up to 10 years prior to the date  
21 of the PF diagnosis (a 10-year time lag), allowing time between smoke exposure and the  
22 development of oxygen-dependent PF.  
23  
24  
25  
26

27 Associations between smoking and the risk of developing oxygen-dependent PF and IPF, and  
28 the interactions between smoking, occupational exposure and gender were estimated and  
29 reported using Mantel-Haenzel analysis, controlling for year of birth, year of diagnosis and  
30 gender, as applicable. Interactions were also analyzed using conditional logistic regression,  
31 stratified for year of birth, year of diagnosis, gender, with adjustment for age and pack-years  
32 of smoking. All estimates were consistent between Mantel-Haenzel analysis and the  
33 conditional logistic models.  
34  
35  
36  
37  
38  
39

40 Associations were expressed as odds ratios (ORs) with 95% confidence intervals (CIs).

41  
42 Statistical significance was defined as a double-sided  $p < 0.05$ . Statistical analyses were  
43 performed using Stata version 11.1 (StataCorp LP; College Station, TX) and SAS version 9.2  
44 (SAS Institute, Inc., Cary, NC).  
45  
46  
47  
48  
49  
50  
51  
52  
53  
54  
55  
56  
57  
58  
59  
60

## RESULTS

We included 171 patients with PF, of whom 137 were classified as having IPF, and 719 control subjects. Baseline characteristics are shown in Table 1. Among PF cases, the rate of any occupational exposure was higher in men than in women (80% vs. 52 %;  $p < 0.001$ ).

Men also had higher smoking exposure. Ten years before the PF diagnosis, 90 (84%) men were ever-smokers with a median 10 (IQR, 3 – 23) pack years, compared to 29 (45%) women with a median 8 (IQR, 3 – 15) pack years. A similar difference was seen for IPF cases.

### Interactions

There was a significant interaction between smoking, occupational exposure and gender, and the risk of developing oxygen-dependent PF (test of homogeneity,  $p = 0.028$ ). The interaction differences in effects ~~was~~ ere similar ~~for in the~~ IPF cohort (Table 2). Men with current or past smoking and occupational exposure had markedly increased risk of PF, OR 4.6 (2.1 – 10.3), and IPF, OR 3.0 (1.3 – 6.5), compared to non-exposed women (Table 2).

Adjustment for differences in pack years between men and women, in addition to the other covariates, did not affect the estimates.

### Dose-response effect

There was a linear association between higher cumulative smoking exposure (up to ten years before diagnosis) and increased risk of PF and IPF, OR 1.03 (95% CI, 1.01 – 1.04) per pack year and OR 1.02 (95% CI, 1.01 – 1.04) per pack year, respectively. Compared to lower levels of smoking (1 – 9 pack years), heavy smoking ( $\geq 20$  pack years) was associated with an increased risk of PF, OR 2.6 (95% CI, 1.4 – 4.9), and IPF, OR 2.5 (95% CI, 1.3 – 5.0), as

Formatted: Font: Bold

Formatted: Font: Bold

Formatted: Font: Bold

1  
2  
3  
4  
5  
6  
7 shown in Table 3. Using a 5-year time lag for smoking exposure instead of 10 years resulted  
8  
9 in similar estimates.

### 10 11 12 13 Subtypes of occupational exposure

14  
15  
16 The effect of occupational exposure seemed to be mediated partly through exposure to birds  
17  
18 and wood dust. The risk of PF was increased by exposure to birds (OR 1.9; 95% CI, 1.0 – 3.7)  
19  
20 and wood dust (OR 1.7; 95% CI, 1.0 – 3.0), controlling for age, gender, year of diagnosis, and  
21  
22 smoking. There were no evidence of effects of inorganic dust (OR 1.3; 95% CI, 0.8 – 2.0) or  
23  
24 metal dust (OR 1.1; 95% CI, 0.6 – 1.8). There were signs of interactions with smoking and  
25  
26 gender for exposure to birds (p = 0.021) and wood dust (p = 0.023), respectively. Estimates  
27  
28 were similar for the IPF cohort, except for a lower effect of bird exposure (OR 1.3; 95% CI,  
29  
30 0.6 – 2.8).

Formatted: Font: Bold

Formatted: Font: Bold

## 31 32 33 34 35 36 37 **DISCUSSION**

38  
39  
40 The main findings are that 1) smoking was a risk determinant in the development of oxygen-  
41  
42 dependent pulmonary fibrosis and that this risk was amplified by male gender and  
43  
44 occupational exposure; 2) the association with smoking was dose-dependent, which may  
45  
46 support the theory of the causative role of smoking in the pathogenesis of severe pulmonary  
47  
48 fibrosis.

49  
50 Our findings are consistent with reports of increased risk of IPF associated with smoking<sup>4-6 10</sup>  
51  
52<sup>12 16</sup> and occupational exposures.<sup>4-7 9 12 14 16</sup> A previous analysis using the present data set

1  
2  
3  
4  
5  
6  
7  
8  
9  
10  
11  
12  
13  
14  
15  
16  
17  
18  
19  
20  
21  
22  
23  
24  
25  
26  
27  
28  
29  
30  
31  
32  
33  
34  
35  
36  
37  
38  
39  
40  
41  
42  
43  
44  
45  
46  
47  
48  
49  
50  
51  
52  
53  
54  
55  
56  
57  
58  
59  
60

showed that specific occupational factors associated with an increased risk of PF included exposure to birds and wood dust.<sup>14</sup> Studies of a possible dose-response correlation between smoking and IPF have shown conflicting results, with two studies indicating a dose-dependent effect<sup>5,6</sup> and one study showing no dose ~~correlation~~-correlation.<sup>17</sup> The latter study, however, analyzed only smoking status and the current smoking dose (cigarettes per day) and not cumulative smoking exposure such as pack years.<sup>17</sup> The present study extends the previous observations by demonstrating that the association between smoking and severe pulmonary fibrosis is dose-dependent and is modified by gender and occupational exposure.

A strength of the present study is that it included cases from a population-based prospective register of patients starting LTOT in Sweden. Control subjects were randomly selected from the general population. Previous studies using control subjects in hospitals may have yielded biased estimates, as the risk of hospitalization is likely to be related to occupational factors and smoking.<sup>4,7,9-11</sup> We had detailed data on the temporality, dose and duration of smoking. In contrast with previous studies, only exposure data up to ten years before the year of the PF diagnosis was included in the analysis to avoid reverse causation and to allow for the time lag between exposure to risk factors and the manifestation of clinical disease.

A possible limitation is that the self-reported exposure data could be influenced by recall bias. The validity of the exposure classification ~~is~~was, however, supported by a high degree of consistency between reported employment histories and occupational exposure to specific agents.<sup>14</sup> ~~Secondly~~, the association between smoking and starting LTOT could be affected by survivor bias, as smokers are likely to be at high risk of dying of other smoke-related diseases, such as cancer and cardiovascular disease, before they can develop severe IPF. Also, stopping smoking is a mandatory criterion for starting LTOT. Both these potential biases would tend to lower the number of smokers starting LTOT ~~and our findings might thus~~and to underestimate the association between smoking and oxygen-dependent PF. ~~Thirdly~~, the IPF diagnosis could

1  
2  
3  
4  
5  
6  
7 be misclassified in some patients, especially as the cohort was collected prior to the  
8 publication of main consensus definition of IPF.<sup>1</sup> The validity of the PF and IPF diagnoses  
9 was checked by ~~a~~ respiratory physicians using medical records, including available  
10 radiographic and histologic data.<sup>14</sup> Among idiopathic interstitial pneumonias, IPF is the most  
11 common condition and it is associated with a high risk of progression to hypoxemic  
12 respiratory failure and death.<sup>18</sup> Thus, the prevalence of IPF is likely high in oxygen-  
13 dependent pulmonary fibrosis. It is possible that we included patients with combined PF and  
14 emphysema, which may be present in up to one third of IPF patients.<sup>19</sup> Concurrent  
15 emphysema may constitute a smoking-related comorbidity or a distinct IPF phenotype,<sup>19</sup> and  
16 could explain, at least partly, the association between smoking, male gender, and the  
17 development of severe IPF in the present study. We included the PF cohort in the analysis, as  
18 it may be difficult to obtain a specific diagnosis in patients with advanced pulmonary fibrosis  
19 ~~at in~~ the clinic. ~~Our results~~ Findings were similar ~~consistent~~ in ~~both~~ the PF and IPF  
20 ~~groups~~ cohorts, which supports the validity of the ~~present analysis~~ findings. Using national  
21 population based cases and controls, the present findings likely have high applicability to  
22 severe PF in Swedish clinical practice. The validity to other settings may be lower owing to  
23 differences in socio-demographics factors, health care organization, and pattern of exposure.  
24  
25 Mechanisms governing the relationship between smoking, gender, occupational exposure,  
26 and the development of severe pulmonary fibrosis are unknown but likely involve complex  
27 interactions between different environmental factors in genetically predisposed individuals.<sup>20</sup>  
28 The adverse effect of smoking could in part be attributable to the development of concurrent  
29 emphysema, which has been associated ~~shown to predict~~ with hypoxemia ~~and a earlier~~  
30 death ~~poor prognosis~~ in IPF.<sup>21</sup>  
31  
32 For the clinician, this study identifies a group of male, heavy smokers with occupational  
33 exposure to harmful substances, who have a greatly increased risk of developing severe  
34  
35  
36  
37  
38  
39  
40  
41  
42  
43  
44  
45  
46  
47  
48  
49  
50  
51  
52  
53  
54  
55  
56  
57  
58  
59  
60

1  
2  
3  
4  
5  
6  
7 pulmonary fibrosis. In this group, interventions to help people reduce or stop smoking are a  
8 top priority.  
9

10  
11 In conclusion, smoking is associated with a dose-dependent increase in oxygen-dependent  
12 pulmonary fibrosis. The adverse effects of smoking are stronger in men and in people with  
13 occupational exposure.  
14  
15  
16  
17  
18  
19

## 20 ACKNOWLEDGEMENTS

21  
22  
23 **Author contributions:** ME had full access to all the data in the study and takes full  
24 responsibility for the integrity of the data and the accuracy of the data analysis. Conception  
25 and design: KB, KN, GT, KT; Acquisition of data: TG, KB, KN, GT, KT; Analysis and  
26 interpretation of data: ME, TG, NM, KT; Drafting the article: ME, TG, KT; Revising it for  
27 important intellectual content and approval of the version to be published: ME, TG, KB, KN,  
28 GT, NM, KT.  
29  
30  
31  
32  
33  
34

35 **Funding:** This study was funded by the Research Council of Blekinge, the Swedish National  
36 Board of Health and Welfare, and the Swedish Heart-Lung Foundation.  
37  
38

39 **Conflicts of interest:** No conflicts of interest exist for the authors.  
40  
41

42 **Other contributions:** The authors thank Kerstin Ström for her invaluable help and inspiration  
43 throughout the study process, and the doctors and nurses who cared for the patients.  
44  
45

46 **Data sharing statement:** Analysis code is available from the corresponding author. No  
47 additional data is available.  
48  
49  
50  
51  
52  
53  
54  
55  
56  
57  
58  
59  
60

## References

- 1 American Thoracic Society/European Respiratory Society International Multidisciplinary Consensus Classification of the Idiopathic Interstitial Pneumonias. This joint statement of the American Thoracic Society (ATS), and the European Respiratory Society (ERS) was adopted by the ATS board of directors, June 2001 and by the ERS Executive Committee, June 2001. *Am J Respir Crit Care Med* 2002;165:277-304.
- 2 Raghu G, Collard HR, Egan JJ et al. An official ATS/ERS/JRS/ALAT statement: idiopathic pulmonary fibrosis: evidence-based guidelines for diagnosis and management. *American Journal of Respiratory and Critical Care Medicine* 2011;183:788-824.
- 3 Navaratnam V, Fleming KM, West J et al. The rising incidence of idiopathic pulmonary fibrosis in the U.K. *Thorax* 2011;66:462-7.
- 4 Iwai K, Mori T, Yamada N, Yamaguchi M, Hosoda Y. Idiopathic pulmonary fibrosis. Epidemiologic approaches to occupational exposure. *American Journal of Respiratory and Critical Care Medicine* 1994;150:670-5.
- 5 Hubbard R, Lewis S, Richards K, Johnston I, Britton J. Occupational exposure to metal or wood dust and aetiology of cryptogenic fibrosing alveolitis. *Lancet* 1996;347:284-9.
- 6 Baumgartner KB, Samet JM, Stidley CA, Colby TV, Waldron JA. Cigarette smoking: a risk factor for idiopathic pulmonary fibrosis. *American Journal of Respiratory and Critical Care Medicine* 1997;155:242-8.
- 7 Miyake Y, Sasaki S, Yokoyama T et al. Occupational and environmental factors and idiopathic pulmonary fibrosis in Japan. *The Annals of occupational hygiene* 2005;49:259-65.
- 8 Scott J, Johnston I, Britton J. What causes cryptogenic fibrosing alveolitis? A case-control study of environmental exposure to dust. *BMJ* 1990;301:1015-7.
- 9 Awadalla NJ, Hegazy A, Elmetwally RA, Wahby I. Occupational and environmental risk factors for idiopathic pulmonary fibrosis in Egypt: a multicenter case-control study. *Int J Occup Environ Med* 2012;3:107-16.
- 10 Garcia-Sancho Figueroa MC, Carrillo G, Perez-Padilla R et al. Risk factors for idiopathic pulmonary fibrosis in a Mexican population. A case-control study. *Respir Med* 2010;104:305-9.
- 11 Miyake Y, Sasaki S, Yokoyama T et al. Case-control study of medical history and idiopathic pulmonary fibrosis in Japan. *Respirology* 2005;10:504-9.
- 12 Taskar VS, Coultas DB. Is idiopathic pulmonary fibrosis an environmental disease? *Proceedings of the American Thoracic Society* 2006;3:293-8.
- 13 Strom K, Boe J. A national register for long-term oxygen therapy in chronic hypoxia: preliminary results. *Eur Respir J* 1988;1:952-8.
- 14 Gustafson T, Dahlman-Hoglund A, Nilsson K, Strom K, Tornling G, Toren K. Occupational exposure and severe pulmonary fibrosis. *Respir Med* 2007;101:2207-12.
- 15 Toren K, Jarvholm B, Brisman J, Hagberg S, Hermansson BA, Lillienberg L. Adult-onset asthma and occupational exposures. *Scand J Work Environ Health* 1999;25:430-5.
- 16 Baumgartner KB, Samet JM, Coultas DB et al. Occupational and environmental risk factors for idiopathic pulmonary fibrosis: a multicenter case-control study. Collaborating Centers. *Am J Epidemiol* 2000;152:307-15.
- 17 Gribbin J, Hubbard R, Smith C. Role of diabetes mellitus and gastro-oesophageal reflux in the aetiology of idiopathic pulmonary fibrosis. *Respir Med* 2009;103:927-31.
- 18 Bjoraker JA, Ryu JH, Edwin MK et al. Prognostic significance of histopathologic subsets in idiopathic pulmonary fibrosis. *Am J Respir Crit Care Med* 1998;157:199-203.
- 19 Cottin V. The impact of emphysema in pulmonary fibrosis. *European Respiratory Review* 2013;22:153-157.
- 20 Macneal K, Schwartz DA. The genetic and environmental causes of pulmonary fibrosis. *Proc Am Thorac Soc* 2012;9:120-5.

Formatted: Swedish (Sweden)

1  
2  
3  
4  
5  
6  
7  
8  
9  
10  
11  
12  
13  
14  
15  
16  
17  
18  
19  
20  
21  
22  
23  
24  
25  
26  
27  
28  
29  
30  
31  
32  
33  
34  
35  
36  
37  
38  
39  
40  
41  
42  
43  
44  
45  
46  
47  
48  
49  
50  
51  
52  
53  
54  
55  
56  
57  
58  
59  
60

21 Meja M, Carrillo G, Rojas-Serrano J et al. Idiopathic pulmonary fibrosis and emphysema: decreased survival associated with severe pulmonary arterial hypertension. *Chest* 2009;136:10-5.

For peer review only

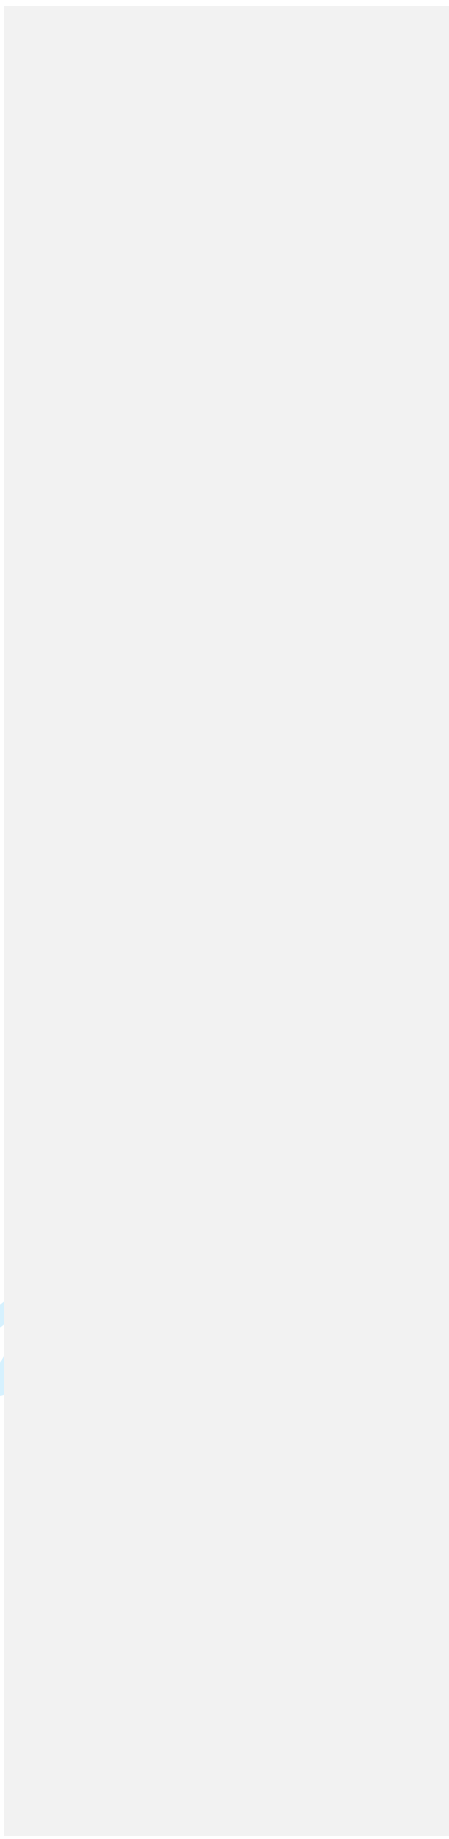



## TABLES

Table 1. Patient characteristics

| Characteristic                                                                                | PF cases<br>(n =<br>171) | IPF<br>cases<br>(n =<br>137) | Controls<br>(n = 719) |
|-----------------------------------------------------------------------------------------------|--------------------------|------------------------------|-----------------------|
| Age                                                                                           | 73.7 ±<br>9.5            | 74.2 ±<br>9.8                | 64.3 ±<br>13.7        |
| Males, n (%)                                                                                  | 107 (63)                 | 86 (63)                      | 337 (47)              |
| Never-smokers, n (%)                                                                          | 52 (30)                  | 44 (32)                      | 344 (48)              |
| Ex-smokers, n (%)                                                                             | 114 (67)                 | 89 (65)                      | 251 (35)              |
| Current smokers, n (%)                                                                        | 5 (3)                    | 4 (3)                        | 124 (17)              |
| Smoking <del>history exposure up to 10 years before PF</del><br>diagnosis, n (%) <sup>*</sup> | 119 (70)                 | 93 (68)                      | 375 (52)              |
| 1 – 9 pack years                                                                              | 29 (17)                  | 22 (16)                      | 176 (24)              |
| 10 – 19 pack years                                                                            | 34 (20)                  | 27 (20)                      | 91 (13)               |
| ≥ 20 pack years                                                                               | 36 (21)                  | 27 (20)                      | 62 (9)                |
| Occupational exposure, n (%) <sup>*</sup>                                                     | 119 (70)                 | 93 (68)                      | 397 (55)              |
| Birds                                                                                         | 16 (9)                   | 11 (8)                       | 33 (5)                |

Formatted: Centered

|                       |                |                |                 |
|-----------------------|----------------|----------------|-----------------|
| <u>Inorganic dust</u> | <u>55 (32)</u> | <u>40 (29)</u> | <u>164 (23)</u> |
| <u>Metal dust</u>     | <u>35 (20)</u> | <u>27 (19)</u> | <u>119 (17)</u> |
| <u>Organic dust</u>   | <u>67 (39)</u> | <u>52 (38)</u> | <u>182 (25)</u> |
| <u>Wood dust</u>      | <u>32 (18)</u> | <u>25 (18)</u> | <u>57 (8)</u>   |

Formatted: Centered

Formatted: Centered

Data presented as mean  $\pm$  standard deviation unless otherwise specified.

\* Exposure earlier than 10 years before PF diagnosis (ten year lag time).

*Abbreviations:* IPF, idiopathic pulmonary fibrosis; PF, pulmonary fibrosis.

**Table 2. Effect of smoking on the adjusted risk of pulmonary fibrosis, according to gender and occupational exposure**

|                          | PF                  |                     | IPF                 |                    |
|--------------------------|---------------------|---------------------|---------------------|--------------------|
|                          | Odds ratio (95% CI) |                     | Odds ratio (95% CI) |                    |
|                          | Women               | Men                 | Women               | Men                |
| No occupational exposure | 1.10 (0.50 – 2.42)  | 1.97 (0.64 – 6.13)  | 1.12 (0.49 – 2.59)  | 1.44 (0.43 – 4.83) |
| Occupational exposure    | 1.10 (0.52 – 2.34)  | 4.63 (2.08 – 10.33) | 1.32 (0.58 – 3.03)  | 2.96 (1.34 – 6.52) |

Odds ratios (95% confidence interval) for the effect of smoking vs. no smoking on the risk of developing PF and IPF, estimated using Mantel Haenzel analysis controlled for year of birth and year of diagnosis. Smoking was defined as the presence of ever-smoking earlier than 10 years before the diagnosis.

*Abbreviations:* CI, confidence interval; IPF, idiopathic pulmonary fibrosis; PF, pulmonary fibrosis.

**Table 3. Dose-response effect of smoking on the risk of severe pulmonary fibrosis**

| Smoking, pack years* | PF                 | IPF                |
|----------------------|--------------------|--------------------|
|                      | OR (95% CI)        | OR (95% CI)        |
| 0                    | 1                  | 1                  |
| 1 – 9                | 1.03 (0.62 – 1.70) | 0.90 (0.52 – 1.57) |
| 10 – 19              | 2.26 (1.35 – 3.80) | 2.10 (1.20 – 3.68) |
| ≥ 20                 | 2.66 (1.56 – 4.55) | 2.25 (1.26 – 4.02) |

Odds ratios (ORs) for levels of smoking estimated using conditional logistic regression adjusted for age and stratified for year of birth, year of diagnosis, gender and occupational exposure.

\* Pack years of smoking up to 10 years before the year of PF diagnosis.

*Abbreviations:* IPF, idiopathic pulmonary fibrosis; PF, pulmonary fibrosis.

STROBE 2007 (v4) Statement—Checklist of items that should be included in reports of *case-control studies*

| Section/Topic                | Item # | Recommendation                                                                                                                                                                       | Reported on page # |
|------------------------------|--------|--------------------------------------------------------------------------------------------------------------------------------------------------------------------------------------|--------------------|
| Title and abstract           | 1      | (a) Indicate the study's design with a commonly used term in the title or the abstract                                                                                               | Title              |
|                              |        | (b) Provide in the abstract an informative and balanced summary of what was done and what was found                                                                                  | Yes                |
| <b>Introduction</b>          |        |                                                                                                                                                                                      |                    |
| Background/rationale         | 2      | Explain the scientific background and rationale for the investigation being reported                                                                                                 | Yes                |
| Objectives                   | 3      | State specific objectives, including any prespecified hypotheses                                                                                                                     | Yes                |
| <b>Methods</b>               |        |                                                                                                                                                                                      |                    |
| Study design                 | 4      | Present key elements of study design early in the paper                                                                                                                              | Yes                |
| Setting                      | 5      | Describe the setting, locations, and relevant dates, including periods of recruitment, exposure, follow-up, and data collection                                                      | Yes                |
| Participants                 | 6      | (a) Give the eligibility criteria, and the sources and methods of case ascertainment and control selection. Give the rationale for the choice of cases and controls                  | Yes                |
|                              |        | (b) For matched studies, give matching criteria and the number of controls per case                                                                                                  | Yes                |
| Variables                    | 7      | Clearly define all outcomes, exposures, predictors, potential confounders, and effect modifiers. Give diagnostic criteria, if applicable                                             | Yes                |
| Data sources/<br>measurement | 8*     | For each variable of interest, give sources of data and details of methods of assessment (measurement). Describe comparability of assessment methods if there is more than one group | Yes                |
| Bias                         | 9      | Describe any efforts to address potential sources of bias                                                                                                                            | Yes                |
| Study size                   | 10     | Explain how the study size was arrived at                                                                                                                                            | Yes                |
| Quantitative variables       | 11     | Explain how quantitative variables were handled in the analyses. If applicable, describe which groupings were chosen and why                                                         | Yes                |
| Statistical methods          | 12     | (a) Describe all statistical methods, including those used to control for confounding                                                                                                | Yes                |
|                              |        | (b) Describe any methods used to examine subgroups and interactions                                                                                                                  | Yes                |
|                              |        | (c) Explain how missing data were addressed                                                                                                                                          | Yes                |
|                              |        | (d) If applicable, explain how matching of cases and controls was addressed                                                                                                          | Yes                |
|                              |        | (e) Describe any sensitivity analyses                                                                                                                                                | Yes                |
| <b>Results</b>               |        |                                                                                                                                                                                      |                    |

|                          |     |                                                                                                                                                                                                              |                                                                                                          |
|--------------------------|-----|--------------------------------------------------------------------------------------------------------------------------------------------------------------------------------------------------------------|----------------------------------------------------------------------------------------------------------|
| Participants             | 13* | (a) Report numbers of individuals at each stage of study—eg numbers potentially eligible, examined for eligibility, confirmed eligible, included in the study, completing follow-up, and analysed            | Yes                                                                                                      |
|                          |     | (b) Give reasons for non-participation at each stage                                                                                                                                                         | Yes                                                                                                      |
|                          |     | (c) Consider use of a flow diagram                                                                                                                                                                           | Yes                                                                                                      |
| Descriptive data         | 14* | (a) Give characteristics of study participants (eg demographic, clinical, social) and information on exposures and potential confounders                                                                     | Yes                                                                                                      |
|                          |     | (b) Indicate number of participants with missing data for each variable of interest                                                                                                                          | Yes                                                                                                      |
| Outcome data             | 15* | Report numbers in each exposure category, or summary measures of exposure                                                                                                                                    | Yes                                                                                                      |
| Main results             | 16  | (a) Give unadjusted estimates and, if applicable, confounder-adjusted estimates and their precision (eg, 95% confidence interval). Make clear which confounders were adjusted for and why they were included | Adjusted analysis presented, biased crude estimates will be added upon request from reviewers or editor. |
|                          |     | (b) Report category boundaries when continuous variables were categorized                                                                                                                                    | Yes                                                                                                      |
|                          |     | (c) If relevant, consider translating estimates of relative risk into absolute risk for a meaningful time period                                                                                             | Yes                                                                                                      |
| Other analyses           | 17  | Report other analyses done—eg analyses of subgroups and interactions, and sensitivity analyses                                                                                                               | Yes                                                                                                      |
| <b>Discussion</b>        |     |                                                                                                                                                                                                              |                                                                                                          |
| Key results              | 18  | Summarise key results with reference to study objectives                                                                                                                                                     | Yes                                                                                                      |
| Limitations              | 19  | Discuss limitations of the study, taking into account sources of potential bias or imprecision. Discuss both direction and magnitude of any potential bias                                                   | Yes                                                                                                      |
| Interpretation           | 20  | Give a cautious overall interpretation of results considering objectives, limitations, multiplicity of analyses, results from similar studies, and other relevant evidence                                   | Yes                                                                                                      |
| Generalisability         | 21  | Discuss the generalisability (external validity) of the study results                                                                                                                                        | Yes                                                                                                      |
| <b>Other information</b> |     |                                                                                                                                                                                                              |                                                                                                          |
| Funding                  | 22  | Give the source of funding and the role of the funders for the present study and, if applicable, for the original study on which the present article is based                                                | Yes                                                                                                      |

\*Give information separately for cases and controls in case-control studies and, if applicable, for exposed and unexposed groups in cohort and cross-sectional studies.

1  
2  
3  
4  
5 **Note:** An Explanation and Elaboration article discusses each checklist item and gives methodological background and published examples of transparent reporting. The STROBE  
6 checklist is best used in conjunction with this article (freely available on the Web sites of PLoS Medicine at <http://www.plosmedicine.org/>, Annals of Internal Medicine at  
7 <http://www.annals.org/>, and Epidemiology at <http://www.epidem.com/>). Information on the STROBE Initiative is available at [www.strobe-statement.org](http://www.strobe-statement.org).  
8  
9  
10  
11  
12  
13  
14  
15  
16  
17  
18  
19  
20  
21  
22  
23  
24  
25  
26  
27  
28  
29  
30  
31  
32  
33  
34  
35  
36  
37  
38  
39  
40  
41  
42  
43  
44  
45  
46  
47  
48  
49

For peer review only
